# Supplementary material
Source: Research Square preprint supplement (doi:10.21203/rs.3.rs-8987032/v1)
Supplement: Supplementary file 1 [file 1a0134fe2fb9a24d18602964.xlsx]

## Sheet: xerC_blast_results_plus_cassett
organism	identity	genus	specie	recX_seq	product_accession	assembly	genomic_accession	start	end	strand	product_length	susCD orthogroups	susCD number	strain	recX_binding_sites
GCF_002222615.2_ASM222261v2	82.576	Bacteroides	caccae	MEKISYNLVFNRKKRLNKKGMALVQVEAYLNRRKIYFSTKIYLKPEQWDTKRRMVKGHPNADVLNRMLYEHIAAIEQIELGLWQQGKSISLELLKDSIDKPVSNGRSFLTFFREEVANSSLKESTRQNHLSTLELLQEFKKEVQFTDLTFEFVSSFDNYLQSKGYHLNTIAKHMKHLKRYVNVAINKDYMDVQKYAFRKYKIKSVEGRHSHLSPEELHKLEDLQLGGKYAKLQKTKDSFLFCCYAGLRYSDFTNLTSANIVEFQQETWLIYKSVKTGIEVRLPLYLLFEGKGIHILQRYKDDLNRFFKLKDNSNINKELNILGKLAEIDKRISFHTARHTNATLLIYSGANITTVQKLLGHKSVKTTQVYANIMDITLVRDLEKAIYSKAGGKHKGN	WP_005678639.1	GCF_002222615.2	NZ_CP022412.2	93546	94739	+	397	407;107	2	Bacteroides caccae strain ATCC 43185	AGTTCTGCAAAGACTTTGCAGA	AGTTCTGCAAAGACTTTGCAGA
GCF_016726305.1_ASM1672630v1	82.576	Bacteroides	caccae	MEKISYNLVFNRKKRLNKKGMALVQVEAYLNRRKIYFSTKIYLKPEQWDTKRRMVKGHPNADVLNRMLYEHIAAIEQIELGLWQQGKSISLELLKDSIDKPVSNGRSFLTFFREEVANSSLKESTRQNHLSTLELLQEFKKEVQFTDLTFEFVSSFDNYLQSKGYHLNTIAKHMKHLKRYVNVAINKDYMDVQKYAFRKYKIKSVEGRHSHLSPEELHKLEDLQLGGKYAKLQKTKDSFLFCCYAGLRYSDFTNLTSANIVEFQQETWLIYKSVKTGIEVRLPLYLLFEGKGIHILQRYKDDLNRFFKLKDNSNINKELNILGKLAEIDKRISFHTARHTNATLLIYSGANITTVQKLLGHKSVKTTQVYANIMDITLVRDLEKAIYSKAGGKHKGN	WP_005678639.1	GCF_016726305.1	NZ_CP068174.1	1064042	1065235	-	397	407;107	2	Bacteroides caccae strain FDAARGOS_1097	AGTTCTGCAAAGACTTTGCAGA	AGTTCTGCAAAGACTTTGCAGA
GCF_016889745.1_ASM1688974v1	82.576	Bacteroides	caccae	MEKISYNLVFNRKKRLNKKGMALVQVEAYLNRRKIYFSTKIYLKPEQWDTKRRMVKGHPNADVLNRMLYEHIAAIEQIELGLWQQGKSISLELLKDSIDKPVSNGRSFLTFFREEVANSSLKESTRQNHLSTLELLQEFKKEVQFTDLTFEFVSSFDNYLQSKGYHLNTIAKHMKHLKRYVNVAINKDYMDVQKYAFRKYKIKSVEGRHSHLSPEELHKLEDLQLGGKYAKLQKTKDSFLFCCYAGLRYSDFTNLTSANIVEFQQETWLIYKSVKTGIEVRLPLYLLFEGKGIHILQRYKDDLNRFFKLKDNSNINKELNILGKLAEIDKRISFHTARHTNATLLIYSGANITTVQKLLGHKSVKTTQVYANIMDITLVRDLEKAIYSKAGGKHKGN	WP_005678639.1	GCF_016889745.1	NZ_CP069532.1	1629612	1630805	+	397	407;107	2	Bacteroides caccae strain FDAARGOS_1219	AGTTCTGCAAAGACTTTGCAGA	AGTTCTGCAAAGACTTTGCAGA
GCF_018292205.1_ASM1829220v1	82.323	Bacteroides	caccae	MEKISYNLVFNRKKRLNKKGMALVQVEAYLNRRKIYFSTKIYLKPEQWDTKRRMVKGHPNADVLNRMLYEHIAAIEQIELGLWQQGKSISLELLKDSIDKPVSNGRSFLTFFREEVANSSLKESTRQNHLSTLELLQEFKKEVQFTDLTFEFVSSFDNYLQSKGYHLNTIAKHMKHLKRYVNVAINKDYMDVQKYAFRKYKIKSVEGRHSHLSPEELHKLEDLQLGGKYAKLQKTKDSFLFCCYAGLRYSDFTNLTSANIVEFQQETWFIYKSVKTGIEVRLPLYLLFEGKGIHILQRYKDDLNRFFKLKDNSNINKELNILGKLAEIDKRISFHTARHTNATLLIYSGANITTVQKLLGHKSVKTTQVYANIMDITLVRDLEKAIYSKAGGKHKGN	WP_005682618.1	GCF_018292205.1	NZ_CP072258.1	93504	94697	-	397	407;107	2	Bacteroides caccae CL03T12C61	AGTTCTGCAAAGACTTTGCAGA	AGTTCTGCAAAGACTTTGCAGA
GCF_020091545.1_ASM2009154v1	82.323	Bacteroides	caccae	MEKISYNLVFNRKKRLNKKGMALVQVEAYLNRRKIYFSTKIYLKPEQWDTKRRMVKGHPNADVLNRMLYEHIAAIEQIELGLWQQGKSISLELLKDSIDKPVSNGRSFLTFFREEVANSSLKESTRQNHLSTLELLQEFKKEVQFTDLTFEFVSSFDNYLQSKGYHLNTIAKHMKHLKRYVNVAINKDYMDVQKYAFRKYKIKSVEGRHSHLSPEELHKLEDLQLGGKYAKLQKTKDSFLFCCYAGLRYSDFTSLTSANIVEFQQETWLIYKSVKTGIEVRLPLYLLFEGKGIHILQRYKDDLNRFFKLKDNSNINKELNILGKLAEIDKRISFHTARHTNATLLIYSGANITTVQKLLGHKSVKTTQVYANIMDITLVRDLEKAIYSKAGGKHKGN	WP_055173058.1	GCF_020091545.1	NZ_CP081920.1	3116358	3117551	+	397	407;107	2	Bacteroides caccae strain BFG-100	AGTTCTGCAAAGACTTTGCAGA	AGTTCTGCAAAGACTTTGCAGA
GCF_025146315.1_ASM2514631v1	82.576	Bacteroides	caccae	MEKISYNLVFNRKKRLNKKGMALVQVEAYLNRRKIYFSTKIYLKPEQWDTKRRMVKGHPNADVLNRMLYEHIAAIEQIELGLWQQGKSISLELLKDSIDKPVSNGRSFLTFFREEVANSSLKESTRQNHLSTLELLQEFKKEVQFTDLTFEFVSSFDNYLQSKGYHLNTIAKHMKHLKRYVNVAINKDYMDVQKYAFRKYKIKSVEGRHSHLSPEELHKLEDLQLGGKYAKLQKTKDSFLFCCYAGLRYSDFTNLTSANIVEFQQETWLIYKSVKTGIEVRLPLYLLFEGKGIHILQRYKDDLNRFFKLKDNSNINKELNILGKLAEIDKRISFHTARHTNATLLIYSGANITTVQKLLGHKSVKTTQVYANIMDITLVRDLEKAIYSKAGGKHKGN	WP_005678639.1	GCF_025146315.1	NZ_CP102256.1	93546	94739	+	397	407;107	2	Bacteroides caccae strain ATCC 43185	AGTTCTGCAAAGACTTTGCAGA	AGTTCTGCAAAGACTTTGCAGA
GCF_032452855.1_ASM3245285v1	82.323	Bacteroides	caccae	MEKISYNLVFNRKKRLNKKGMALVQVEAYLNRRKIYFSTKIYLKPEQWDTKRRMVKGHPNADVLNRMLYEHIAAIEQIELGLWQQGKSISLELLKDSIDKPVSNGRSFLTFFREEVANSSLKESTRQNHLSTLELLQEFKKEVQFTDLTFEFVSSFDNYLQSKGYHLNTIAKHMKHLKRYVNVAINKDYMDVQKYAFRKYKIKSVEGRHSHLSPEELHKLEDLQLGGKYAKLQKTKDSFLFCCYAGLRYSDFTSLTSANIVEFQQETWLIYKSVKTGIEVRLPLYLLFEGKGIHILQRYKDDLNRFFKLKDNSNINKELNILGKLAEIDKRISFHTARHTNATLLIYSGANITTVQKLLGHKSVKTTQVYANIMDITLVRDLEKAIYSKAGGKHKGN	WP_055173058.1	GCF_032452855.1	NZ_CP134819.1	93551	94744	+	397	407;107	2	Bacteroides caccae strain H-1617	AGTTCTGCAAAGACTTTGCAGA	AGTTCTGCAAAGACTTTGCAGA
GCF_001688725.2_ASM168872v2	79.898	Bacteroides	caecimuris	MEKISYNLVFNRKKRLNKRGMALVQVEAYLNRKKMYFSTKIYLKPEQWDAKRKMVKNHPNANVLNRMLYENIAAIEQTELGLWQQGKTISLDLLRNSIDKPLSNERSFLIFFKDEIANSSLKESTRQNHLSTLELLQGFKKEVLFTDLTFEFVSSFDNYLQSKSYHLNTIAKHMKHLKRYVNVAINKEYMDIQKYAFRKYKIKSIEGSHTHLAPEELYRFENLQLTGRYTRLQKTKDAFLFCCYAGLRYSDFISLTSANIIEFHQETWIIYKSVKTGIEVRLPLYLLFEGKGIEILQHYEDDLDSFFKLKDNSNINKELSLLAGLAKIDKRVSFHTARHTNATLLLYSGANITTVQKLLGHKSVKTTQVYANIMDITVVRDLEKTASSKLYNKQ	WP_065539441.1	GCF_001688725.2	NZ_CP015401.2	3375161	3376345	-	394	517;58;790	3	Bacteroides caecimuris strain I48	AGTTCTGCAAAGACTTTGCAGA	AGTTCTGCAAAGACTTTGCAGA	AGTTCTGCAAAGACTTTGCAGA
GCF_001318345.1_ASM131834v1	68.09	Bacteroides	cellulosilyticus	MNKIIYSLVYNRKKSLNKRGVALVQVEAYLNRKKKYFSTKVYLRPDQWDAKKLLVKNHPNADALNRLIYEFMAMIEKRELELWQQGKPITLEILKEMLSEQQEQEDKSSFIPFFKQEVMTSGLKESTKRNHLSTLALLQDFKKNVTFSDLTFEFVSSFEYFLQSKGYHTNTIAKHMKHLKRHINVAINKEYMDIQKYAFRKYKIKTVENGHTHLAPEELEKMETLQLTGRYIKYQKTLDAFLFCCYAGMRYSDFVNMKPENIVEMHQETWLIYKSIKTGTEVRLPLYLLFNGKGIQILNKYQANLQDFFHLRDNSNVNKELIIITRLAGLSKKVSFHTARHTNATLLIYNGVNITTVQKLLGHKSVKTTQIYTNVMDMTIISDLEKNHSLAHRKKGK	WP_007212827.1	GCF_001318345.1	NZ_CP012801.1	4921903	4923096	-	397	480;618;290;321;569	5	Bacteroides cellulosilyticus strain WH2	AGTTCTGCGAAAACGCTTCAGA	AGTTCTGCGAAAACGCTTCAGA	AGTTCTGCGAAAACATTGCAAA	AGTTCTGCGAATACGTTGCAGA	AGTTCTGCGAAGACTTTGCAGG
GCF_018292125.1_ASM1829212v1	68.09	Bacteroides	cellulosilyticus	MNKIIYSLVYNRKKSLNKRGVALVQVEAYLNRKKKYFSTKVYLRPDQWDAKKLLVKNHPNADALNRLIYEFMAMIEKRELELWQQGKPITLEILKEMLSEQQEQEDKSSFIPFFKQEVMTSGLKESTKRNHLSTLALLQDFKKNVTFSDLTFEFVSSFEYFLQSKGYHTNTIAKHMKHLKRHINVAINKEYMDIQKYAFRKYKIKTVENGHTHLAPEELEKMETLQLTGRYIKYQKTLDAFLFCCYAGMRYSDFVNMKPENIVEMHQETWLIYKSIKTGTEVRLPLYLLFNGKGIQILNKYQANLQDFFHLRDNSNVNKELIIITRLAGLSKKVSFHTARHTNATLLIYNGVNITTVQKLLGHKSVKTTQIYTNVMDMTIISDLEKNHSLAHRKKGK	WP_007212827.1	GCF_018292125.1	NZ_CP072251.1	7168241	7169434	-	397	569;687;290;480;618;290;687;612	8	Bacteroides cellulosilyticus strain CL06T03C01	AGTTCTGCGAAAACATTGCAAA	AGTTCTGCGAATACGTTGCAGA	AGTTCTGCGAAGACTTTGCAGG	AGTTCTGCGAAGACTTTGCAGG	AGTTCTGCGAATACGTTGCAGA	AGTTCTGCGAAAACATTGCAAA	AGTTCTGCGAAAACGCTTCAGA	AGTTCTGCGAAAACGCTTCAGA
GCF_020091405.1_ASM2009140v1	68.593	Bacteroides	cellulosilyticus	MNKIIYSLVYNRKKSLNKRGMALVQVEAYLNRKKKYFSTKVYLRPDQWDAKKLLVKNHPNADALNRLIYEFMAMIEKRELELWQQGKPITLDVLKDVLTEKQEQEDKSLFIPFFRQEIMTSGLKESTKRNHLSTVALLQDFKKGVTFSEMTFEFISSFEYYLQSKGYHVNTIAKHMKHLKRHINVAINKEYMDIQKYAFRKYKIKTVENRHTHLSPEELEKLETLQLTGRHTKYQKTLDAFLFCCYAGMRYSDFVNMKPENIVEMHQETWLIYKSIKTGTEVRLPIYLLFCGKGIQILNKYQANLQDFFHLRDNSNVNKELIIIARLAGLPKRVSFHTARHTNATLLIYNGVNITTVQKLLGHKSVKTTQIYTNVMDMTIISDLEKNHSLAHRKKGK	WP_217714816.1	GCF_020091405.1	NZ_CP081903.1	2820601	2821794	-	397	612;640;321;640;199	5	Bacteroides cellulosilyticus strain BFG-250	AGTTCTGCGAAGACTTTGCAGG	AGTTCTGCGAATACATTGCAAA	AGTTCTGCGAAAACATTGCAAA	AGTTCTGCGAATACATTGCAAA	AGTTCTGCGAAGACTTTGCGGG
GCF_025263845.1_ASM2526384v1	68.09	Bacteroides	cellulosilyticus	MNKIIYSLVYNRKKSLNKRGVALVQVEAYLNRKKKYFSTKVYLRPDQWDAKKLLVKNHPNADALNRLIYEFMAMIEKRELELWQQGKPITLEILKEMLSEQQEQEDKSSFIPFFKHEVMTSNLKESTKRNHLSTLALLQDFKKNVTFSDLTFEFVSSFEYFLQSKGYHTNTIAKHMKHLKRHINVAINKEYMDIQKYAFRKYKIKTVENGHTHLAPEELEKMETLQLTGRYIKYQKTLDAFLFCCYAGMRYSDFVNMKPENIVEMHQETWLIYKSIKTGTEVRLPLYLLFNGKGIQILNKYQANLQDFFHLRDNSNVNKELIIITRLAGLSKKVSFHTARHTNATLLIYNGVNITTVQKLLGHKSVKTTQIYTNVMDMTIISDLEKNHSLAHRKKGK	WP_149925029.1	GCF_025263845.1	NZ_CP102938.1	3054362	3055555	+	397	612;845;687;480;618;569	6	Bacteroides cellulosilyticus strain PL2022	AGTTCTGCGAAGACTTTGCAGG	AGTTCTGCGAATACGTTGCAAA	AGTTCTGCGAAAACATTGCAAA	AGTTCTGCGAAAACGCTTCAGA	AGTTCTGCGAAAACGCTTCAGA	AGTTCTGCGAAGACTTTGCAGG
GCF_016894205.1_ASM1689420v1	71.615	Bacteroides	eggerthii	MNKIIYNLVYNRKKCLNKKGMALVQVEAYLGRKKKYFSTKVYLKPEQWDNKKLIVKNHPNADALNRLIYEFVATIEKKELELWQQGKRISLELLKNALTTQENNSSFISFFRQEVMNSSLKDSTKRNHLSTLMLLQEFKKNITFSDLTFELISSFEYFLQLKGYHTNTIAKHMKHLKRHVNIAINKEYIEIQKYAFRKYKIKTIENKHTHLVPEELERLENLILSGRYVKLQKSLDAFLFCCYAGMRYSDFINLSSENFVDINQETWLIYKSVKTGTEVRLPLYLLFSGKGIAILNKYRDNLEDFFHLRDNSNVNKDLIIITRLAGLSKRISFHTARHTNATLLIYNGINITTVQKLLGHKSVKTTQVYTNVMDMTIIHDLEKMK	WP_004289019.1	GCF_016894205.1	NZ_CP069794.1	7921	9078	+	385	58;732;615	3	Bacteroides eggerthii strain FDAARGOS_1221	AGTTCTGCGAAGACTTTGCGTG	AGTTCTGCGAAGACTTTGCAAA	AGTTCTGCGAAGACTTTGCGTG
GCF_018289295.1_ASM1828929v1	71.615	Bacteroides	eggerthii	MNKIIYNLVYNRKKCLNKKGMALVQVEAYLGRKKKYFSTKVYLKPEQWDNKKLIVKNHPNADALNRLIYEFVATIEKKELELWQQGKRISLELLKNALTTQENNSSFISFFRQEVMNSSLKDSTKRNHLSTLMLLQEFKKNITFSDLTFELISSFEYFLQLKGYHTNTIAKHMKHLKRHVNIAINKEYIEIQKYAFRKYKIKTIENKHTHLVPEELERLENLILSGRYVKLQKSLDAFLFCCYAGMRYSDFINLSSENFVDINQETWLIYKSVKTGTEVRLPLYLLFSGKGIAILNKYRDNLEDFFHLRDNSNVNKDLIIITRLAGLSKRISFHTARHTNATLLIYNGINITTVQKLLGHKSVKTTQVYTNVMDMTIIHDLEKMK	WP_004289019.1	GCF_018289295.1	NZ_CP072227.1	2740359	2741516	-	385	615;578;578;1190	4	Bacteroides eggerthii strain CL11T00C20	AGTTCTGCGAAGACTTTGCGTG	AGTTCTGCGAAAACTTTGCAAA	AGTTCTGCGAAAACTTTGCAGA	AGTTCTGCGAAGACTTTGCGTG
GCF_025146565.1_ASM2514656v1	71.615	Bacteroides	eggerthii	MNKIIYNLVYNRKKCLNKKGMALVQVEAYLGRKKKYFSTKVYLKPEQWDNKKLIVKNHPNADALNRLIYEFVATIEKKELELWQQGKRISLELLKNALTTQENNSSFISFFRQEVMNSSLKDSTKRNHLSTLMLLQEFKKNITFSDLTFELISSFEYFLQLKGYHTNTIAKHMKHLKRHVNIAINKEYIEIQKYAFRKYKIKTIENKHTHLVPEELERLENLILSGRYVKLQKSLDAFLFCCYAGMRYSDFINLSSENFVDINQETWLIYKSVKTGTEVRLPLYLLFSGKGIAILNKYRDNLEDFFHLRDNSNVNKDLIIITRLAGLSKRISFHTARHTNATLLIYNGINITTVQKLLGHKSVKTTQVYTNVMDMTIIHDLEKMK	WP_004289019.1	GCF_025146565.1	NZ_CP102258.1	1387998	1389155	+	385	615;732;58	3	Bacteroides eggerthii strain DSM 20697	AGTTCTGCGAAGACTTTGCGTG	AGTTCTGCGAAGACTTTGCAAA	AGTTCTGCGAAGACTTTGCGTG
GCF_020091505.1_ASM2009150v1	95.455	Bacteroides	faecis	MKKISYSLVFNRKKKLNKKGMALVQVEAYLNRRKMYFSTRVYLKPEQWDVKRRMVKNHPNSDALNRMLYDFIADIEQKELGLWQQRRSISLDSLKDSIDKPENSGNSFLTFFKEEVNNSSLKESTKQNHLSTLELLQEYKKDIVFTDLTFEFVSSFDNYLQSKGYHLNTIAKHMKHLKRYVNVAINKEYMDIQKYAFRKYKIKSIEGNHTHLSPEELNKMENLILEGKFTKLQKSKDAFLFCCYAGLRYSDFINLTAANIVELHQETWLIYKSVKTGIDVRLPLYLLFEGKGLKVLEHYKEDLDGFFKLKDNSNVNKDLNALAKLAKMDKRISFHTARHTNATLLIYSGANITTVQKLLGHKSVKTTQVYANIMDMTIVHDLEKAAHSKLANRQKG	WP_010539501.1	GCF_020091505.1	NZ_CP081916.1	146952	148142	+	396	23;58;66	3	Bacteroides faecis strain BFG-108	AGTTCTGCAAAGACTTTGCAGA	AGTTCTGCAAAGACTTTGCAAA	AGTTCTGCAAAGACTTTGCAGA
GCF_024759405.1_ASM2475940v1	95.455	Bacteroides	faecis	MKKISYSLVFNRKKKLNKKGMALVQVEAYLNRRKMYFSTRVYLKPEQWDVKRRMVKNHPNSDALNRMLYDFIADIEQKELGLWQQRRSISLDSLKDSIDKPENSGNSFLTFFKEEVNNSSLKESTKQNHLSTLELLQEYKKDIVFTDLTFEFVSSFDNYLQSKGYHLNTIAKHMKHLKRYVNVAINKEYMDIQKYAFRKYKIKSIEGNHTHLSPEELNKMENLILEGKFTKLQKSKDAFLFCCYAGLRYSDFINLTAANIVELHQETWLIYKSVKTGIDVRLPLYLLFEGKGLKVLEHYKEDLDGFFKLKDNSNVNKDLNALAKLAKMDKRISFHTARHTNATLLIYSGANITTVQKLLGHKSVKTTQVYANIMDMTIVHDLEKAAHSKLANRQKG	WP_010539501.1	GCF_024759405.1	NZ_CP103141.1	140765	141955	+	396	23;58;66	3	Bacteroides faecis strain BFG-527	AGTTCTGCAAAGACTTTGCAGA	AGTTCTGCAAAGACTTTGCAAA	AGTTCTGCAAAGACTTTGCAGA
GCF_024760145.1_ASM2476014v1	95.202	Bacteroides	faecis	MKKISYSLVFNRKKKLNKKGMALVQVEAYLNRRKMYFSTRVYLKPEQWDVKRRMVKNHPNSDALNRMLYDFIADIEQKELGLWQQRRSISLDSLKDSIDKPENSGNSFLTFFKEEVNNSSLKESTKQNHLSTLELLQEYKKDIVFTDLTFEFVSSFDNYLQSKGYHLNTIAKHMKHLKRYVNVAINKEYMDIQKYAFRKYKIKSIEGNHTHLSPEELNKMENLILEGKFTKLQKSKDAFLFCCYAGLRYSDFINLTAANIVELHQETWLIYKSVKTGIDVRLPLYLLFEGKGLKVLEHYKEDLDGFFKLKDNSNVNKDLNALAKLAKMDKRISFHTARHTNATLLIYSGANITTVQKLLGHKSVKTTQVYANIIDMTIVHDLEKAAHSKLANRQKG	WP_258910262.1	GCF_024760145.1	NZ_CP103274.1	156520	157710	-	396	23;1028;66	3	Bacteroides faecis strain BFG-467	AGTTCTGCAAAGACTTTGCAGA	AGTTCTGCAAAGACTTTGCAAA	AGTTCTGCAAAGACTTTGCAGA
GCF_024760225.1_ASM2476022v1	95.202	Bacteroides	faecis	MKKISYSLVFNRKKKLNKKGMALVQVEAYLNRRKMYFSTRVYLKPEQWDVKRRMVKNHPNSDALNRMLYDFIADIEQKELGLWQQRRSISLDSLKDSIDKPENSGNSFLTFFKEEVNNSSLKESTKQNHLSTLELLQEYKKDIVFTDLTFEFVSSFDNYLQSKGYHFNTIAKHMKHLKRYVNVAINKEYMDIQKYAFRKYKIKSIEGNHTHLSPEELNKMENLILEGKFTKLQKSKDAFLFCCYAGLRYSDFINLTAANIVELHQETWLIYKSVKTGIDVRLPLYLLFEGKGLKVLEHYKEDLDGFFKLKDNSNVNKDLNALAKLAKMDKRISFHTARHTNATLLIYSGANITTVQKLLGHKSVKTTQVYANIMDMTIVHDLEKAAHSKLANRQKG	WP_258898046.1	GCF_024760225.1	NZ_CP103271.1	178379	179569	-	396	23;58;66	3	Bacteroides faecis strain BFG-513	AGTTCTGCAAAGACTTTGCAGA	AGTTCTGCAAAGACTTTGCAAA	AGTTCTGCAAAGACTTTGCAGA
GCF_025914295.1_ASM2591429v1	95.455	Bacteroides	faecis	MKKISYSLVFNRKKKLNKKGMALVQVEAYLNRRKMYFSTRVYLKPEQWDVKRRMVKNHPNSDALNRMLYDFIADIEQKELGLWQQRRSISLDSLKDSIDKPENSGNSFLTFFKEEVNNSSLKESTKQNHLSTLELLQEYKKDIVFTDLTFEFVSSFDNYLQSKGYHLNTIAKHMKHLKRYVNVAINKEYMDIQKYAFRKYKIKSIEGNHTHLSPEELNKMENLILEGKFTKLQKSKDAFLFCCYAGLRYSDFINLTAANIVELHQETWLIYKSVKTGIDVRLPLYLLFEGKGLKVLEHYKEDLDGFFKLKDNSNVNKDLNALAKLAKMDKRISFHTARHTNATLLIYSGANITTVQKLLGHKSVKTTQVYANIMDMTIVHDLEKAAHSKLANRQKG	WP_010539501.1	GCF_025914295.1	NZ_CP083678.1	1992166	1993356	+	396	23;58;66	3	Bacteroides faecis strain WAL8736	AGTTCTGCAAAGACTTTGCAGA	AGTTCTGCAAAGACTTTGCAAA	AGTTCTGCAAAGACTTTGCAGA
GCF_012113595.1_ASM1211359v1	83.679	Bacteroides	faecium	MEKISYNLVFNRKKKLNKKGMALVQVEAYLNRRKMYFSTKIYLKVDQWDAKRRMVKGHPNADVLNRMLYEYIAAIEQTELGLWQQGKSISLDLLKESIDKPVSSGRSFLSFYKEEVANSSLKESTKQNHLSTLELLREFKKDISFTDLTFEFVSSFDNYLQSRGYHLNTIAKHMKHLKRYVNVAINKEHMDVQKYAFRKYKIKSVEGNHTHLSPEELHKFEDLQLTGKFVKLQKTKDAFLFCCYAGLRYSDFINLTSANIVEFHQETWLIYKSVKTGIEVRLPLYLLFEGKGIGILQRYKEGLNNFFKLKDNSNINKELNILANLAGIDKRVSFHTARHTNATLLLYSGANITTVQKLLGHKSVKTTQVYANIMDITVVRDLEKAALLKGNGTHKI	WP_167959500.1	GCF_012113595.1	NZ_CP050831.1	152112	153302	+	396	1147;1106	2	Bacteroides faecium strain CBA7301	AGTTCTGCAAAGACTTTGCAGA	AGTTCTGCAAAGACTTTGCAAA
GCF_000009925.1_ASM992v1	75.844	Bacteroides	fragilis	MDKIIYSLVYNRKKSLNKKGMALVQVEAYLNRKKKYFSTKVYLSPDQWDFKKRMVKNHPNADAINHMLYEFMAEIEKKELGLWQQGKQISLDSLKNSMENQDDSTSFIAFFRNEIAKSSLKESTKRNHLSTLELLRSYKKDVSFSELTFEFISSFDHYLQQKGYHTNTIAKHMKHLKRHINVAINKEYMEIQKYAFRKYKIKSVENNHTHLSPEELGKIESLELGGRFTKLEKTKDAFLFCCYAGLRYSDFTNLSPENIVKMHQETWLIYKSVKTNTEVRLPLYLLFEGKGIEVLNKYQDDLADFFKLRDNSNVNKELLIIAKLSGLNKRISFHTARHTNATLLIYSGVNITTVQKLLGHKSVKTTQVYTNIMDITIVRDLEKSKNNRKVSYM	WP_005784676.1	GCF_000009925.1	NC_006347.1	781419	782600	+	393	70;80;73	3	Bacteroides fragilis YCH46	AGTTCTGCAAAGACTTTGCAGA	AGTTCTGCAAAGACTTTGCAGA	AGTTCTGCAAAGACTTTGCAGA
GCF_000025985.1_ASM2598v1	75.844	Bacteroides	fragilis	MDKIIYSLVYNRKKSLNKKGMALVQVEAYLNRKKKYFSTKVYLSPDQWDFKKRMVKNHPNADAINHMLYEFMAEIEKKELGLWQQGKQISLDSLKNSMENQDDSTSFIAFFRNEIAKSSLKESTKRNHLSTLELLRSYKKDVSFSELTFEFISSFDHYLQQKGYHTNTIAKHMKHLKRHINVAINKEYMEIQKYAFRKYKIKSVENNHTHLSPEELGKIESLELGGRFTKLEKTKDAFLFCCYAGLRYSDFTNLSPENIVKMHQETWLIYKSVKTNTEVRLPLYLLFEGKGIEVLNKYQDDLADFFKLRDNSNVNKELLIIAKLSGLNKRISFHTARHTNATLLIYSGVNITTVQKLLGHKSVKTTQVYTNIMDITIVRDLEKSKNNRKVSYM	WP_005784676.1	GCF_000025985.1	NC_003228.3	714211	715392	-	393	70;217;80;73	4	Bacteroides fragilis NCTC 9343	AGTTCTGCAAAGACTTTGCAGA	AGTTCTGCAAAGACTTTGCAGA	AGTTCTGCAAAGACTTTGCAGA	AGTTCTGCAAAGACTTTGCAGA
GCF_000210835.1_ASM21083v1	75.844	Bacteroides	fragilis	MDKIIYSLVYNRKKSLNKKGMALVQVEAYLNRKKKYFSTKVYLSPDQWDFKKRMVKNHPNADAINHMLYEFMAEIEKKELGLWQQGKQISLDSLKNSMENQDDSTSFIAFFRNEIAKSSLKESTKRNHLSTLELLRSYKKDVSFSELTFEFISSFDHYLQQKGYHTNTIAKHMKHLKRHINVAINKEYMEIQKYAFRKYKIKSVENNHTHLSPEELGKIESLELGGRFTKLEKTKDAFLFCCYAGLRYSDFTNLSPENIVKMHQETWLIYKSVKTNTEVRLPLYLLFEGKGIEVLNKYQDDLADFFKLRDNSNVNKELLIIAKLSGLNKRISFHTARHTNATLLIYSGVNITTVQKLLGHKSVKTTQVYTNIMDITIVRDLEKSKNNHKVSYM	WP_008658427.1	GCF_000210835.1	NC_016776.1	769929	771110	+	393	70;80;73	3	Bacteroides fragilis 638R	AGTTCTGCAAAGACTTTGCAGA	AGTTCTGCAAAGACTTTGCAGA	AGTTCTGCAAAGACTTTGCAGA
GCF_000710365.2_ASM71036v3	76.364	Bacteroides	fragilis	MDKIIYSLVYNRKKSLNKKGMALVQVEAYLNRKKKYFSTKVYLSPDQWDFKKRMVKNHPNADAINHMLYEFMAEIEKKELGLWQQGKQISLDSLKNSMESQDDGTSFIAFFRNEIAKSSLKESTKRNHLSTLELLRGYKKDVSFSDLTFEFISSFDHYLQQKGYHTNTIAKHMKHLKRHINVAINKEYMEIQKYAFRKYKIKSIENSHTHLSPEELGKIESLELDGRFMKLEKTKDAFLFCCYAGLRYSDFTNLSPENIVKMHQETWLIYKSVKTNTEVRLPLYLLFEGKGIEVLNKYQDNLADFFKLRDNSNVNKELLIIAKLSGLNKRISFHTARHTNATLLIYSGVNITTVQKLLGHKSVKTTQVYTNIMDITIVRDLEKSKNNRKVSYM	WP_005783269.1	GCF_000710365.2	NZ_CP036546.1	1707963	1709144	-	393	70;80;73	3	Bacteroides fragilis strain DCMSKEJBY0001B	AGTTCTGCAAAGACTTTGCAAA	AGTTCTGCAAAGACTTTGCAAA	AGTTCTGCAAAGACTTTGCAGA
GCF_000710375.2_ASM71037v3	76.364	Bacteroides	fragilis	MDKIIYSLVYNRKKSLNKKGMALVQVEAYLNRKKKYFSTKVYLSPDQWDFKKRMVKNHPNADAINHMLYEFMAEIEKKELGLWQQGKQISLDSLKNSMESQDDGTSFIAFFRNEIAKSSLKESTKRNHLSTLELLRGYKKDVSFSDLTFEFISSFDHYLQQKGYHTNTIAKHMKHLKRHINVAINKEYMEIQKYAFRKYKIKSIENSHTHLSPEELGKIESLELDGRFMKLEKTKDAFLFCCYAGLRYSDFTNLSPENIVKMHQETWLIYKSVKTNTEVRLPLYLLFEGKGIEVLNKYQDNLADFFKLRDNSNVNKELLIIAKLSGLNKRISFHTARHTNATLLIYSGVNITTVQKLLGHKSVKTTQVYTNIMDITIVRDLEKSKNNRKVSYM	WP_005783269.1	GCF_000710375.2	NZ_CP036539.1	1623602	1624783	+	393	70;80;73	3	Bacteroides fragilis strain DCMOUH0017B	AGTTCTGCAAAGACTTTGCAGA	AGTTCTGCAAAGACTTTGCAAA	AGTTCTGCAAAGACTTTGCAAA
GCF_000724665.2_ASM72466v3	76.364	Bacteroides	fragilis	MDKIIYSLVYNRKKSLNKKGMALVQVEAYLNRKKKYFSTKVYLSPDQWDFKKRMVKNHPNADAINHMLYEFMAEIEKKELGLWQQGKQISLDSLKNSMESQDDGTSFIAFFRNEIAKSSLKESTKRNHLSTLELLRGYKKDVSFSDLTFEFISSFDHYLQQKGYHTNTIAKHMKHLKRHINVAINKEYMEIQKYAFRKYKIKSIENSHTHLSPEELGKIESLELDGRFMKLEKTKDAFLFCCYAGLRYSDFTNLSPENIVKMHQETWLIYKSVKTNTEVRLPLYLLFEGKGIEVLNKYQDNLADFFKLRDNSNVNKELLIIAKLSGLNKRISFHTARHTNATLLIYSGVNITTVQKLLGHKSVKTTQVYTNIMDITIVRDLEKSKNNRKVSYM	WP_005783269.1	GCF_000724665.2	NZ_CP036542.1	1600257	1601438	-	393	70;73	2	Bacteroides fragilis strain DCMOUH0018B	AGTTCTGCAAAGACTTTGCAGA	AGTTCTGCAAAGACTTTGCAGA
GCF_000724795.2_ASM72479v2	75.844	Bacteroides	fragilis	MDKIIYSLVYNRKKSLNKKGMALVQVEAYLNRKKKYFSTKVYLSPDQWDFKKRMVKNHPNADAINHMLYEFMAEIEKKELGLWQQGKQISLDSLKNSMENQDDSTSFIAFFRNEIAKSSLKESTKRNHLSTLELLRSYKKDVSFSELTFEFISSFDHYLQQKGYHTNTIAKHMKHLKRHINVAINKEYMEIQKYAFRKYKIKSVENNHTHLSPEELGKIESLELGGRFTKLEKTKDAFLFCCYAGLRYSDFTNLSPENIVKMHQETWLIYKSVKTNTEVRLPLYLLFEGKGIEVLNKYQDDLADFFKLRDNSNVNKELLIIAKLSGLNKRISFHTARHTNATLLIYSGVNITTVQKLLGHKSVKTTQVYTNIMDITIVRDLEKSKNNRKVSYM	WP_005784676.1	GCF_000724795.2	NZ_CP036550.1	1591084	1592265	+	393	70;217;80;73	4	Bacteroides fragilis strain DCMOUH0042B	AGTTCTGCAAAGACTTTGCAGA	AGTTCTGCAAAGACTTTGCAGA	AGTTCTGCAAAGACTTTGCAGA	AGTTCTGCAAAGACTTTGCAGA
GCF_000724805.2_ASM72480v2	76.364	Bacteroides	fragilis	MDKIIYSLVYNRKKSLNKKGMALVQVEAYLNRKKKYFSTKVYLSPDQWDFKKRMVKNHPNADAINHMLYEFMAEIEKKELGLWQQGKQISLDSLKNSMESQDDGTSFIAFFRNEIAKSSLKESTKRNHLSTLELLRGYKKDVSFSDLTFEFISSFDHYLQQKGYHTNTIAKHMKHLKRHINVAINKEYMEIQKYAFRKYKIKSIENSHTHLSPEELGKIESLELDGRFMKLEKTKDAFLFCCYAGLRYSDFTNLSPENIVKMHQETWLIYKSVKTNTEVRLPLYLLFEGKGIEVLNKYQDNLADFFKLRDNSNVNKELLIIAKLSGLNKRISFHTARHTNATLLIYSGVNITTVQKLLGHKSVKTTQVYTNIMDITIVRDLEKSKNNRKVSYM	WP_005783269.1	GCF_000724805.2	NZ_CP036553.1	1545050	1546231	-	393	70;217;80;73	4	Bacteroides fragilis strain DCMOUH0067B	AGTTCTGCAAAGACTTTGCAGA	AGTTCTGCAAAGACTTTGCAAA	AGTTCTGCAAAGACTTTGCAAA	AGTTCTGCAAAGACTTTGCAGA
GCF_000724815.2_ASM72481v2	76.364	Bacteroides	fragilis	MDKIIYSLVYNRKKSLNKKGMALVQVEAYLNRKKKYFSTKVYLSPDQWDFKKRMVKNHPNADAINHMLYEFMAEIEKKELGLWQQGKQISLDSLKNSMESQDDGTSFIAFFRNEIAKSSLKESTKRNHLSTLELLRGYKKDVSFSDLTFEFISSFDHYLQQKGYHTNTIAKHMKHLKRHINVAINKEYMEIQKYAFRKYKIKSIENSHTHLSPEELGKIESLELDGRFMKLEKTKDAFLFCCYAGLRYSDFTNLSPENIVKMHQETWLIYKSVKTNTEVRLPLYLLFEGKGIEVLNKYQDNLADFFKLRDNSNVNKELLIIAKLSGLNKRISFHTARHTNATLLIYSGVNITTVQKLLGHKSVKTTQVYTNIMDITIVRDLEKSKNNRKVSYM	WP_005783269.1	GCF_000724815.2	NZ_CP037440.1	1750235	1751416	+	393	70;80;73	3	Bacteroides fragilis strain DCMOUH0085B	AGTTCTGCAAAGACTTTGCAGA	AGTTCTGCAAAGACTTTGCAAA	AGTTCTGCAAAGACTTTGCAGA
GCF_000965785.1_ASM96578v1	75.844	Bacteroides	fragilis	MDKIIYSLVYNRKKSLNKKGMALVQVEAYLNRKKKYFSTKVYLSPDQWDFKKRMVKNHPNADAINHMLYEFMAEIEKKELGLWQQGKQISLDSLKNSMENQDDSTSFIAFFRNEIAKSSLKESTKRNHLSTLELLRSYKKDVSFSELTFEFISSFDHYLQQKGYHTNTIAKHMKHLKRHINVAINKEYMEIQKYAFRKYKIKSVENNHTHLSPEELGKIESLELGGRFTKLEKTKDAFLFCCYAGLRYSDFTNLSPENIVKMHQETWLIYKSVKTNTEVRLPLYLLFEGKGIEVLNKYQDDLADFFKLRDNSNVNKELLIIAKLSGLNKRISFHTARHTNATLLIYSGVNITTVQKLLGHKSVKTTQVYTNIMDITIVRDLEKSKNNRKVSYM	WP_005784676.1	GCF_000965785.1	NZ_CP011073.1	657113	658294	-	393	70;217;80;73	4	Bacteroides fragilis strain BOB25	AGTTCTGCAAAGACTTTGCAGA	AGTTCTGCAAAGACTTTGCAGA	AGTTCTGCAAAGACTTTGCAGA	AGTTCTGCAAAGACTTTGCAGA
GCF_001286525.1_BFBE1.1	75.844	Bacteroides	fragilis	MDKIIYSLVYNRKKSLNKKGMALVQVEAYLNRKKKYFSTKVYLSPDQWDFKKRMVKNHPNADAINHMLYEFMAEIEKKELGLWQQGKQISLDSLKNSMENQDDSTSFIAFFRNEIAKSSLKESTKRNHLSTLELLRSYKKDVSFSELTFEFISSFDHYLQQKGYHTNTIAKHMKHLKRHINVAINKEYMEIQKYAFRKYKIKSVENNHTHLSPEELGKIESLELGGRFTKLEKTKDAFLFCCYAGLRYSDFTNLSPENIVKMHQETWLIYKSVKTNTEVRLPLYLLFEGKGIEVLNKYQDDLADFFKLRDNSNVNKELLIIAKLSGLNKRISFHTARHTNATLLIYSGVNITTVQKLLGHKSVKTTQVYTNIMDITIVRDLEKSKNNRKVSYM	WP_005784676.1	GCF_001286525.1	NZ_LN877293.1	744747	745928	-	393	70;217;80;73	4	Bacteroides fragilis strain BE1	AGTTCTGCAAAGACTTTGCAGA	AGTTCTGCAAAGACTTTGCAGA	AGTTCTGCAAAGACTTTGCAGA	AGTTCTGCAAAGACTTTGCAGA
GCF_001682215.1_ASM168221v1	75.844	Bacteroides	fragilis	MDKIIYSLVYNRKKSLNKKGMALVQVEAYLNRKKKYFSTKVYLSPDQWDFKKRMVKNHPNADAINHMLYEFMAEIEKKELGLWQQGKQISLDSLKNSMENQDDSTSFIAFFRNEIAKSSLKESTKRNHLSTLELLRSYKKDVSFSELTFEFISSFDHYLQQKGYHTNTIAKHMKHLKRHINVAINKEYMEIQKYAFRKYKIKSVENNHTHLSPEELGKIESLELGGRFTKLEKTKDAFLFCCYAGLRYSDFTNLSPENIVKMHQETWLIYKSVKTNTEVRLPLYLLFEGKGIEVLNKYQDDLADFFKLRDNSNVNKELLIIAKLSGLNKRISFHTARHTNATLLIYSGVNITTVQKLLGHKSVKTTQVYTNIMDITIVRDLEKSKNNRKVSYM	WP_005784676.1	GCF_001682215.1	NZ_CP012706.1	60254	61435	-	393	70;217;80;73	4	Bacteroides fragilis strain S14	AGTTCTGCAAAGACTTTGCAGA	AGTTCTGCAAAGACTTTGCAGA	AGTTCTGCAAAGACTTTGCAGA	AGTTCTGCAAAGACTTTGCAGA
GCF_002849695.1_ASM284969v1	76.501	Bacteroides	fragilis	MDKIIYSLVYNRKKSLNKKGMALVQVEAYLNRKKKYFSTKVYLSPDQWDFKKRMVKNHPNADAINHMLYEFMAEIEKKELGLWQQGKQISLDSLKNSMESQDDGTSFIAFFRNEIAKSSLKESTKRNHLSTLELLRGYKKDVSFSDLTFEFISSFDHYLQQKGYHTNTIAKHMKHLKRHINVAINKEYMEIQKYAFRKYKIKSIENSHTHLSPEELGKIESLELDGRFMKLEKTKDAFLFCCYAGLRYSDFTNLSPENIVKMHQETWLIYKSVKTNTEVRLPLYLLFEGKGIEVLNKYQDNLADFFKLRDNSNVNKELLIIAKLSGLNKRISFHTARHTNATLLIYSGVNITTVQKLLGHKSVKTTQVYTNIMDITIVRDLENLNSATLL	WP_101602553.1	GCF_002849695.1	NZ_CP018937.1	30203	31375	-	390	70;80;73	3	Bacteroides fragilis strain Q1F2	AGTTCTGCAAAGACTTTGCAGA	AGTTCTGCAAAGACTTTGCAGA	AGTTCTGCAAAGACTTTGCAGA
GCF_005706655.1_ASM570665v1	75.844	Bacteroides	fragilis	MDKIIYSLVYNRKKSLNKKGMALVQVEAYLNRKKKYFSTKVYLSPDQWDFKKRMVKNHPNADAINHMLYEFMAEIEKKELGLWQQGKQISLDSLKNSMENQDDSTSFIAFFRNEIAKSSLKESTKRNHLSTLELLRSYKKDVSFSELTFEFISSFDHYLQQKGYHTNTIAKHMKHLKRHINVAINKEYMEIQKYAFRKYKIKSVENNHTHLSPEELGKIESLELGGRFTKLEKTKDAFLFCCYAGLRYSDFTNLSPENIVKMHQETWLIYKSVKTNTEVRLPLYLLFEGKGIEVLNKYQDDLADFFKLRDNSNVNKELLIIAKLSGLNKRISFHTARHTNATLLIYSGVNITTVQKLLGHKSVKTTQVYTNIMDITIVRDLEKSKNNRKVSYM	WP_005784676.1	GCF_005706655.1	NZ_CP036555.1	1650419	1651600	-	393	70;217;80;73	4	Bacteroides fragilis strain CCUG 4856	AGTTCTGCAAAGACTTTGCAGA	AGTTCTGCAAAGACTTTGCAGA	AGTTCTGCAAAGACTTTGCAGA	AGTTCTGCAAAGACTTTGCAGA
GCF_008369705.1_ASM836970v1	75.844	Bacteroides	fragilis	MDKIIYSLVYNRKKSLNKKGMALVQVEAYLNRKKKYFSTKVYLSPDQWDFKKRMVKNHPNADAINHMLYEFMAEIEKKELGLWQQGKQISLDSLKNSMENQDDSTSFIAFFRNEIAKSSLKESTKRNHLSTLELLRSYKKDVSFSELTFEFISSFDHYLQQKGYHTNTIAKHMKHLKRHINVAINKEYMEIQKYAFRKYKIKSVENNHTHLSPEELGKIESLELGGRFTKLEKTKDAFLFCCYAGLRYSDFTNLSPENIVKMHQETWLIYKSVKTNTEVRLPLYLLFEGKGIEVLNKYQDDLADFFKLRDNSNVNKELLIIAKLSGLNKRISFHTARHTNATLLIYSGVNITTVQKLLGHKSVKTTQVYTNIMDITIVRDLEKSKNNRKVSYM	WP_005784676.1	GCF_008369705.1	NZ_CP043610.1	5281669	5282850	+	393	70;80;217;73	4	Bacteroides fragilis strain GUT04	AGTTCTGCAAAGACTTTGCAGA	AGTTCTGCAAAGACTTTGCAGA	AGTTCTGCAAAGACTTTGCAGA	AGTTCTGCAAAGACTTTGCAGA
GCF_013267555.1_ASM1326755v1	76.364	Bacteroides	fragilis	MDKIIYSLVYNRKKSLNKKGMALVQVEAYLNRKKKYFSTKVYLSPDQWDFKKRMVKNHPNADAINHMLYEFMAEIEKKELGLWQQGKQISLDSLKNSMESQDDGTSFIAFFRNEIAKSSLKESTKRNHLSTLELLRGYKKDVSFSDLTFEFISSFDHYLQQKGYHTNTIAKHMKHLKRHINVAINKEYMEIQKYAFRKYKIKSIENSHTHLSPEELGKIESLELDGRFMKLEKTKDAFLFCCYAGLRYSDFTNLSPENIVKMHQETWLIYKSVKTNTEVRLPLYLLFEGKGIEVLNKYQDNLADFFKLRDNSNVNKELLIIAKLSGLNKRISFHTARHTNATLLIYSGVNITTVQKLLGHKSVKTTQVYTNIMDITIVRDLEKSKNNRKVSYM	WP_005783269.1	GCF_013267555.1	NZ_CP054003.1	2745171	2746352	-	393	73;217;80;70	4	Bacteroides fragilis strain FDAARGOS_763	AGTTCTGCAAAGACTTTGCAGA	AGTTCTGCAAAGACTTTGCAAA	AGTTCTGCAAAGACTTTGCAAA	AGTTCTGCAAAGACTTTGCAGA
GCF_016864615.1_ASM1686461v1	76.364	Bacteroides	fragilis	MDKIIYSLVYNRKKSLNKKGMALVQVEAYLNRKKKYFSTKVYLSPDQWDFKKRMVKNHPNADAINHMLYEFMAEIEKKELGLWQQGKQISLDSLKNSMESQDDGTSFIAFFRNEIAKSSLKESTKRNHLSTLELLRGYKKDVSFSDLTFEFISSFDHYLQQKGYHTNTIAKHMKHLKRHINVAINKEYMEIQKYAFRKYKIKSIENSHTHLSPEELGKIESLELDGRFMKLEKTKDAFLFCCYAGLRYSDFTNLSPENIVKMHQETWLIYKSVKTNTEVRLPLYLLFEGKGIEVLNKYQDNLADFFKLRDNSNVNKELLIIAKLSGLNKRISFHTARHTNATLLIYSGVNITTVQKLLGHKSVKTTQVYTNIMDITIVRDLEKSKNNRKVSYM	WP_005783269.1	GCF_016864615.1	NZ_CP044428.1	1527561	1528742	+	393	70;80;73	3	Bacteroides fragilis strain DK1985	AGTTCTGCAAAGACTTTGCAGA	AGTTCTGCAAAGACTTTGCAAA	AGTTCTGCAAAGACTTTGCAAA
GCF_016889925.1_ASM1688992v1	75.584	Bacteroides	fragilis	MDKIIYSLVYNRKKSLNKKGMALVQVEAYLNRKKKYFSTKVYLSPDQWDFKKRMVKNHPNADAINHMLYEFMAEIEKKELGLWQQGKQISLDLLKNSMENQDDSTSFIAFFRNEIAKSSLKESTKRNHLSTLELLRSYKKDVSFSELTFEFISSFDHYLQQKGYHTNTIAKHMKHLKRHINVAINKEYMEIQKYAFRKYKIKSVENNHTHLSPEELGKIESLELGGRFTKLEKTKDAFLFCCYAGLRYSDFTNLSPENIVKMHQETWLIYKSVKTNTEVRLPLYLLFEGKGIEVLNKYQDDLADFFKLRDNSNVNKELLIIAKLSGLNKRISFHTARHTNATLLIYSGVNITTVQKLLGHKSVKTTQVYTNIMDITIVRDLEKSKNNRKVSYM	WP_008769369.1	GCF_016889925.1	NZ_CP069563.1	2572714	2573895	+	393	73;80;217;70	4	Bacteroides fragilis strain FDAARGOS_1225	AGTTCTGCAAAGACTTTGCAGA	AGTTCTGCAAAGACTTTGCAGA	AGTTCTGCAAAGACTTTGCAAA	AGTTCTGCAAAGACTTTGCAGA
GCF_020091565.1_ASM2009156v1	75.844	Bacteroides	fragilis	MDKIIYSLVYNRKKSLNKKGMALVQVEAYLNRKKKYFSTKVYLSPDQWDFKKRMVKNHPNADAINHMLYEFMAEIEKKELGLWQQGKQISLDSLKNSMENQDDSTSFIAFFRNEIAKSSLKESTKRNHLSTLELLRSYKKDVSFSELTFEFISSFDHYLQQKGYHTNTIAKHMKHLKRHINVAINKEYMEIQKYAFRKYKIKSVENNHTHLSPEELGKIESLELGGRFTKLEKTKDAFLFCCYAGLRYSDFTNLSPENIVKMHQETWLIYKSVKTNTEVRLPLYLLFEGKGIEVLNKYQDDLADFFKLRDNSNVNKELLIIAKLSGLNKRISFHTARHTNATLLIYSGVNITTVQKLLGHKSVKTTQVYTNIMDITIVRDLEKSKNNRKVSYM	WP_005784676.1	GCF_020091565.1	NZ_CP081922.1	581598	582779	+	393	70;217;80;73	4	Bacteroides fragilis strain BFG-1	AGTTCTGCAAAGACTTTGCAGA	AGTTCTGCAAAGACTTTGCAGA	AGTTCTGCAAAGACTTTGCAGA	AGTTCTGCAAAGACTTTGCAGA
GCF_020097275.1_ASM2009727v1	75.844	Bacteroides	fragilis	MDKIIYSLVYNRKKSLNKKGMALVQVEAYLNRKKKYFSTKVYLSPDQWDFKKRMVKNHPNADAINHMLYEFMAEIEKKELGLWQQGKQISLDSLKNSMENQDDSTSFIAFFRNEIAKSSLKESTKRNHLSTLELLRSYKKDVSFSELTFEFISSFDHYLQQKGYHTNTIAKHMKHLKRHINVAINKEYMEIQKYAFRKYKIKSVENNHTHLSPEELGKIESLELGGRFTKLEKTKDAFLFCCYAGLRYSDFTNLSPENIVKMHQETWLIYKSVKTNTEVRLPLYLLFEGKGIEVLNKYQDDLADFFKLRDNSNVNKELLIIAKLSGLNKRISFHTARHTNATLLIYSGVNITTVQKLLGHKSVKTTQVYTNIMDITIVRDLEKSKNNRKVSYM	WP_005784676.1	GCF_020097275.1	NZ_CP083623.1	367889	369070	+	393	73;217;80;70	4	Bacteroides fragilis strain FDAARGOS_1512	AGTTCTGCAAAGACTTTGCAGA	AGTTCTGCAAAGACTTTGCAGA	AGTTCTGCAAAGACTTTGCAGA	AGTTCTGCAAAGACTTTGCAGA
GCF_021359565.1_ASM2135956v1	76.364	Bacteroides	fragilis	MDKIIYSLVYNRKKSLNKKGMALVQVEAYLNRKKKYFSTKVYLSPDQWDFKKRMVKNHPNADAINHMLYEFMAEIEKKELGLWQQGKQISLDSLKNSMESQDDGTSFIAFFRNEIAKSSLKESTKRNHLSTLELLRGYKKDVSFSDLTFEFISSFDHYLQQKGYHTNTIAKHMKHLKRHINVAINKEYMEIQKYAFRKYKIKSIENSHTHLSPEELGKIESLELDGRFMKLEKTKDAFLFCCYAGLRYSDFTNLSPENIVKMHQETWLIYKSVKTNTEVRLPLYLLFEGKGIEVLNKYQDNLADFFKLRDNSNVNKELLIIAKLSGLNKRISFHTARHTNATLLIYSGVNITTVQKLLGHKSVKTTQVYTNIMDITIVRDLEKSKNNRKVSYM	WP_005783269.1	GCF_021359565.1	NZ_CP080295.1	1613550	1614731	-	393	70;80;73	3	Bacteroides fragilis strain IHMA_4	AGTTCTGCAAAGACTTTGCAGA	AGTTCTGCAAAGACTTTGCAAA	AGTTCTGCAAAGACTTTGCAGA
GCF_021359585.1_ASM2135958v1	76.364	Bacteroides	fragilis	MDKIIYSLVYNRKKSLNKKGMALVQVEAYLNRKKKYFSTKVYLSPDQWDFKKRMVKNHPNADAINHMLYEFMAEIEKKELGLWQQGKQISLDSLKNSMESQDDGTSFIAFFRNEIAKSSLKESTKRNHLSTLELLRGYKKDVSFSDLTFEFISSFDHYLQQKGYHTNTIAKHMKHLKRHINVAINKEYMEIQKYAFRKYKIKSIENSHTHLSPEELGKIESLELDGRFMKLEKTKDAFLFCCYAGLRYSDFTNLSPENIVKMHQETWLIYKSVKTNTEVRLPLYLLFEGKGIEVLNKYQDNLADFFKLRDNSNVNKELLIIAKLSGLNKRISFHTARHTNATLLIYSGVNITTVQKLLGHKSVKTTQVYTNIMDITIVRDLEKSKNNRKVSYM	WP_005783269.1	GCF_021359585.1	NZ_CP080296.1	1523766	1524947	-	393	70;217;80;73	4	Bacteroides fragilis strain IHMA_13	AGTTCTGCAAAGACTTTGCAGA	AGTTCTGCAAAGACTTTGCAAA	AGTTCTGCAAAGACTTTGCAAA	AGTTCTGCAAAGACTTTGCAGA
GCF_025916355.1_ASM2591635v1	75.844	Bacteroides	fragilis	MDKIIYSLVYNRKKSLNKKGMALVQVEAYLNRKKKYFSTKVYLSPDQWDFKKRMVKNHPNADAINHMLYEFMAEIEKKELGLWQQGKQISLDSLKNSMENQDDSTSFIAFFRNEIAKSSLKESTKRNHLSTLELLRSYKKDVSFSELTFEFISSFDHYLQQKGYHTNTIAKHMKHLKRHINVAINKEYMEIQKYAFRKYKIKSVENNHTHLSPEELGKIESLELGGRFTKLEKTKDAFLFCCYAGLRYSDFTNLSPENIVKMHQETWLIYKSVKTNTEVRLPLYLLFEGKGIEVLNKYQDDLADFFKLRDNSNVNKELLIIAKLSGLNKRISFHTARHTNATLLIYSGVNITTVQKLLGHKSVKTTQVYTNIMDITIVRDLEKSKNNRKVSYM	WP_005784676.1	GCF_025916355.1	NZ_CP083688.1	941385	942566	-	393	70;80;73	3	Bacteroides fragilis strain DH4096B	AGTTCTGCAAAGACTTTGCAGA	AGTTCTGCAAAGACTTTGCAGA	AGTTCTGCAAAGACTTTGCAGA
GCF_028743275.1_ASM2874327v1	75.844	Bacteroides	fragilis	MDKIIYSLVYNRKKSLNKKGMALVQVEAYLNRKKKYFSTKVYLSPDQWDFKKRMVKNHPNADAINHMLYEFMAEIEKKELGLWQQGKQISLDSLKNSMENQDDSTSFIAFFRNEIAKSSLKESTKRNHLSTLELLRSYKKDVSFSELTFEFISSFDHYLQQKGYHTNTIAKHMKHLKRHINVAINKEYMEIQKYAFRKYKIKSVENNHTHLSPEELGKIESLELGGRFTKLEKTKDAFLFCCYAGLRYSDFTNLSPENIVKMHQETWLIYKSVKTNTEVRLPLYLLFEGKGIEVLNKYQDDLADFFKLRDNSNVNKELLIIAKLSGLNKRISFHTARHTNATLLIYSGVNITTVQKLLGHKSVKTTQVYTNIMDITIVRDLEKSKNNRKVSYM	WP_005784676.1	GCF_028743275.1	NZ_CP117955.1	4799375	4800556	+	393	70;217;80;73	4	Bacteroides fragilis strain OB EAV1 11 D6 FAA	AGTTCTGCAAAGACTTTGCAGA	AGTTCTGCAAAGACTTTGCAGA	AGTTCTGCAAAGACTTTGCAGA	AGTTCTGCAAAGACTTTGCAGA
GCF_030294885.1_ASM3029488v1	75.844	Bacteroides	fragilis	MDKIIYSLVYNRKKSLNKKGMALVQVEAYLNRKKKYFSTKVYLSPDQWDFKKRMVKNHPNADAINHMLYEFMAEIEKKELGLWQQGKQISLDSLKNSMENQDDSTSFIAFFRNEIAKSSLKESTKRNHLSTLELLRSYKKDVSFSELTFEFISSFDHYLQQKGYHTNTIAKHMKHLKRHINVAINKEYMEIQKYAFRKYKIKSVENNHTHLSPEELGKIESLELGGRFTKLEKTKDAFLFCCYAGLRYSDFTNLSPENIVKMHQETWLIYKSVKTNTEVRLPLYLLFEGKGIEVLNKYQDDLADFFKLRDNSNVNKELLIIAKLSGLNKRISFHTARHTNATLLIYSGVNITTVQKLLGHKSVKTTQVYTNIMDITIVRDLEKSKNNRKVSYM	WP_005784676.1	GCF_030294885.1	NZ_CP114371.1	697082	698263	+	393	70;217;80;73	4	Bacteroides fragilis strain P207	AGTTCTGCAAAGACTTTGCAGA	AGTTCTGCAAAGACTTTGCAGA	AGTTCTGCAAAGACTTTGCAGA	AGTTCTGCAAAGACTTTGCAGA
GCF_030944245.1_ASM3094424v1	76.364	Bacteroides	fragilis	MDKIIYSLVYNRKKSLNKKGMALVQVEAYLNRKKKYFSTKVYLSPDQWDFKKRMVKNHPNADAINHMLYEFMAEIEKKELGLWQQGKQISLDSLKNSMESQDDGTSFIAFFRNEIAKSSLKESTKRNHLSTLELLRGYKKDVSFSDLTFEFISSFDHYLQQKGYHTNTIAKHMKHLKRHINVAINKEYMEIQKYAFRKYKIKSIENSHTHLSPEELGKIESLELDGRFMKLEKTKDAFLFCCYAGLRYSDFTNLSPENIVKMHQETWLIYKSVKTNTEVRLPLYLLFEGKGIEVLNKYQDNLADFFKLRDNSNVNKELLIIAKLSGLNKRISFHTARHTNATLLIYSGVNITTVQKLLGHKSVKTTQVYTNIMDITIVRDLEKSKNNRKVSYM	WP_005783269.1	GCF_030944245.1	NZ_CP133097.1	1586316	1587497	+	393	70;80;66	3	Bacteroides fragilis strain GS084	AGTTCTGCAAAGACTTTGCAGA	AGTTCTGCAAAGACTTTGCAAA	AGTTCTGCAAAGACTTTGCAAA
GCF_040142445.1_MDR_U01	76.364	Bacteroides	fragilis	MDKIIYSLVYNRKKSLNKKGMALVQVEAYLNRKKKYFSTKVYLSPDQWDFKKRMVKNHPNADAINHMLYEFMAEIEKKELGLWQQGKQISLDSLKNSMESQDDGTSFIAFFRNEIAKSSLKESTKRNHLSTLELLRGYKKDVSFSDLTFEFISSFDHYLQQKGYHTNTIAKHMKHLKRHINVAINKEYMEIQKYAFRKYKIKSIENSHTHLSPEELGKIESLELDGRFMKLEKTKDAFLFCCYAGLRYSDFTNLSPENIVKMHQETWLIYKSVKTNTEVRLPLYLLFEGKGIEVLNKYQDNLADFFKLRDNSNVNKELLIIAKLSGLNKRISFHTARHTNATLLIYSGVNITTVQKLLGHKSVKTTQVYTNIMDITIVRDLEKSKNNRKVSYM	WP_005783269.1	GCF_040142445.1	NZ_CP119600.1	1527500	1528681	+	393	70;80;73	3	Bacteroides fragilis strain MDR_U01	AGTTCTGCAAAGACTTTGCAGA	AGTTCTGCAAAGACTTTGCAAA	AGTTCTGCAAAGACTTTGCAAA
GCF_040142595.1_MDR_L04	76.364	Bacteroides	fragilis	MDKIIYSLVYNRKKSLNKKGMALVQVEAYLNRKKKYFSTKVYLSPDQWDFKKRMVKNHPNADAINHMLYEFMAEIEKKELGLWQQGKQISLDSLKNSMESQDDGTSFIAFFRNEIAKSSLKESTKRNHLSTLELLRGYKKDVSFSDLTFEFISSFDHYLQQKGYHTNTIAKHMKHLKRHINVAINKEYMEIQKYAFRKYKIKSIENSHTHLSPEELGKIESLELDGRFMKLEKTKDAFLFCCYAGLRYSDFTNLSPENIVKMHQETWLIYKSVKTNTEVRLPLYLLFEGKGIEVLNKYQDNLADFFKLRDNSNVNKELLIIAKLSGLNKRISFHTARHTNATLLIYSGVNITTVQKLLGHKSVKTTQVYTNIMDITIVRDLEKSKNNRKVSYM	WP_005783269.1	GCF_040142595.1	NZ_CP119603.1	1674064	1675245	+	393	70;80;73	3	Bacteroides fragilis strain MDR_L04	AGTTCTGCAAAGACTTTGCAGA	AGTTCTGCAAAGACTTTGCAAA	AGTTCTGCAAAGACTTTGCAGA
GCF_040687795.1_BfragS36L11_hyb1	75.844	Bacteroides	fragilis	MDKIIYSLVYNRKKSLNKKGMALVQVEAYLNRKKKYFSTKVYLSPDQWDFKKRMVKNHPNADAINHMLYEFMAEIEKKELGLWQQGKQISLDSLKNSMENQDDSTSFIAFFRNEIAKSSLKESTKRNHLSTLELLRSYKKDVSFSELTFEFISSFDHYLQQKGYHTNTIAKHMKHLKRHINVAINKEYMEIQKYAFRKYKIKSVENNHTHLSPEELGKIESLELGGRFTKLEKTKDAFLFCCYAGLRYSDFTNLSPENIVKMHQETWLIYKSVKTNTEVRLPLYLLFEGKGIEVLNKYQDDLADFFKLRDNSNVNKELLIIAKLSGLNKRISFHTARHTNATLLIYSGVNITTVQKLLGHKSVKTTQVYTNIMDITIVRDLEKSKNNRKVSYM	WP_005784676.1	GCF_040687795.1	NZ_CP131534.1	3874667	3875848	+	393	70;217;80;73	4	Bacteroides fragilis strain S36L11	AGTTCTGCAAAGACTTTGCAGA	AGTTCTGCAAAGACTTTGCAGA	AGTTCTGCAAAGACTTTGCAGA	AGTTCTGCAAAGACTTTGCAGA
GCF_040687805.1_Bfrag638R-erm-GA1tetQ-6_hyb1	75.844	Bacteroides	fragilis	MDKIIYSLVYNRKKSLNKKGMALVQVEAYLNRKKKYFSTKVYLSPDQWDFKKRMVKNHPNADAINHMLYEFMAEIEKKELGLWQQGKQISLDSLKNSMENQDDSTSFIAFFRNEIAKSSLKESTKRNHLSTLELLRSYKKDVSFSELTFEFISSFDHYLQQKGYHTNTIAKHMKHLKRHINVAINKEYMEIQKYAFRKYKIKSVENNHTHLSPEELGKIESLELGGRFTKLEKTKDAFLFCCYAGLRYSDFTNLSPENIVKMHQETWLIYKSVKTNTEVRLPLYLLFEGKGIEVLNKYQDDLADFFKLRDNSNVNKELLIIAKLSGLNKRISFHTARHTNATLLIYSGVNITTVQKLLGHKSVKTTQVYTNIMDITIVRDLEKSKNNHKVSYM	WP_008658427.1	GCF_040687805.1	NZ_CP131535.1	4008144	4009325	-	393	73;80;70	3	Bacteroides fragilis strain 638R-erm-GA1tetQ-6	AGTTCTGCAAAGACTTTGCAGA	AGTTCTGCAAAGACTTTGCAGA	AGTTCTGCAAAGACTTTGCAGA
GCF_040687815.1_Bfrag1284_hyb1	75.844	Bacteroides	fragilis	MDKIIYSLVYNRKKSLNKKGMALVQVEAYLNRKKKYFSTKVYLSPDQWDFKKRMVKNHPNADAINHMLYEFMAEIEKKELGLWQQGKQISLDSLKNSMENQDDSTSFIAFFRNEIAKSSLKESTKRNHLSTLELLRSYKKDVSFSELTFEFISSFDHYLQQKGYHTNTIAKHMKHLKRHINVAINKEYMEIQKYAFRKYKIKSVENNHTHLSPEELGKIESLELGGRFTKLEKTKDAFLFCCYAGLRYSDFTNLSPENIVKMHQETWLIYKSVKTNTEVRLPLYLLFEGKGIEVLNKYQDDLADFFKLRDNSNVNKELLIIAKLSGLNKRISFHTARHTNATLLIYSGVNITTVQKLLGHKSVKTTQVYTNIMDITIVRDLEKSKNNRKVSYM	WP_005784676.1	GCF_040687815.1	NZ_CP131536.1	806383	807564	+	393	70;217;80;73	4	Bacteroides fragilis strain 1284	AGTTCTGCAAAGACTTTGCAGA	AGTTCTGCAAAGACTTTGCAGA	AGTTCTGCAAAGACTTTGCAGA	AGTTCTGCAAAGACTTTGCAGA
GCF_040687825.1_Bfrag078320-1_hyb1	75.844	Bacteroides	fragilis	MDKIIYSLVYNRKKSLNKKGMALVQVEAYLNRKKKYFSTKVYLSPDQWDFKKRMVKNHPNADAINHMLYEFMAEIEKKELGLWQQGKQISLDSLKNSMENQDDSTSFIAFFRNEIAKSSLKESTKRNHLSTLELLRSYKKDVSFSELTFEFISSFDHYLQQKGYHTNTIAKHMKHLKRHINVAINKEYMEIQKYAFRKYKIKSVENNHTHLSPEELGKIESLELGGRFTKLEKTKDAFLFCCYAGLRYSDFTNLSPENIVKMHQETWLIYKSVKTNTEVRLPLYLLFEGKGIEVLNKYQDDLADFFKLRDNSNVNKELLIIAKLSGLNKRISFHTARHTNATLLIYSGVNITTVQKLLGHKSVKTTQVYTNIMDITIVRDLEKSKNNRKVSYM	WP_005784676.1	GCF_040687825.1	NZ_CP131537.1	162420	163601	-	393	73;80;70	3	Bacteroides fragilis strain 078320-1	AGTTCTGCAAAGACTTTGCAGA	AGTTCTGCAAAGACTTTGCAGA	AGTTCTGCAAAGACTTTGCAGA
GCF_004115325.2_ASM411532v2	76.364	Bacteroides	fragilis	MDKIIYSLVYNRKKSLNKKGMALVQVEAYLNRKKKYFSTKVYLSPDQWDFKKRMVKNHPNADAINHMLYEFMAEIEKKELGLWQQGKQISLDSLKNSMESQDDGTSFIAFFRNEIAKSSLKESTKRNHLSTLELLRGYKKDVSFSDLTFEFISSFDHYLQQKGYHTNTIAKHMKHLKRHINVAINKEYMEIQKYAFRKYKIKSIENSHTHLSPEELGKIESLELDGRFMKLEKTKDAFLFCCYAGLRYSDFTNLSPENIVKMHQETWLIYKSVKTNTEVRLPLYLLFEGKGIEVLNKYQDNLADFFKLRDNSNVNKELLIIAKLSGLNKRISFHTARHTNATLLIYSGVNITTVQKLLGHKSVKTTQVYTNIMDITIVRDLEKSKNNRKVSYM	WP_005783269.1	GCF_004115325.2	NZ_CP040630.1	1782147	1783328	+	393	70;80;73	3	Bacteroides sp. PHL 2737	AGTTCTGCAAAGACTTTGCAGA	AGTTCTGCAAAGACTTTGCAGA	AGTTCTGCAAAGACTTTGCAGA
GCF_011038705.2_ASM1103870v2	76.364	Bacteroides	fragilis	MDKIIYSLVYNRKKSLNKKGMALVQVEAYLNRKKKYFSTKVYLSPDQWDFKKRMVKNHPNADAINHMLYEFMAEIEKKELGLWQQGKQISLDSLKNSMESQDDGTSFIAFFRNEIAKSSLKESTKRNHLSTLELLRGYKKDVSFSDLTFEFISSFDHYLQQKGYHTNTIAKHMKHLKRHINVAINKEYMEIQKYAFRKYKIKSIENSHTHLSPEELGKIESLELDGRFMKLEKTKDAFLFCCYAGLRYSDFTNLSPENIVKMHQETWLIYKSVKTNTEVRLPLYLLFEGKGIEVLNKYQDNLADFFKLRDNSNVNKELLIIAKLSGLNKRISFHTARHTNATLLIYSGVNITTVQKLLGHKSVKTTQVYTNIMDITIVRDLEKSKNNRKVSYM	WP_005783269.1	GCF_011038705.2	NZ_CP072198.1	1626149	1627330	+	393	70;80;217;73	4	Bacteroides sp. ZJ-18	AGTTCTGCAAAGACTTTGCAGA	AGTTCTGCAAAGACTTTGCAAA	AGTTCTGCAAAGACTTTGCAAA	AGTTCTGCAAAGACTTTGCAGA
GCF_000186225.1_ASM18622v1	68.75	Bacteroides	helcogenes	MNKIIYTLVYNRKKCLNKKGVALVQVEAYLNRKKKYFSTKVYLKPEQWDAKKLIVKNHPNADALNRLIYEYISQMEKKELELWQQGRRISLELLKEMLNTNENNASFIPFLYKEITNSILKKSTKKNHLSTLALLQEFKKDVTFSELTFEFISSFEHFLQLKGYHTNTVAKHMKHLKKYINVAINKEYMSMQQYAFRKYKIRMVENKHTHLIPEELDKLEKLDLTGKNTKYQKTLDAFLFCCYAGMRYSDFISLMPNNIVEINKEIWLVYKSVKTNTEVRLPLYLLFGGKGIDILRKYWDNIQAFFHIKDNSNANKDLIILARLAGISKKISFHTARHTNATLLIYNGVNITTVQKLLGHKSVKTTQIYTNVMDMTIVCDLEKNLGNNFPVR	WP_013546793.1	GCF_000186225.1	NC_014933.1	1513543	1514721	-	392	480;1060;1029	3	Bacteroides helcogenes P 36-108	AGTTCCGCGAAAACTTTGGTGA	AGTTCCGCGAAAACTTTGATAA	AGTTCCGCGAAAACTTTGGTGA
GCF_002998535.1_ASM299853v1	64.062	Bacteroides	heparinolyticus	MNKITYRLVYNRKKCLNRQGTALVQVEAYLKNKKKYFSTGVYLKPEQWDTARCVVKKHPNADALNRWIQQYATEIEKKELDMWRQGKRISLESLKDGLSGNSDPSSFLHFFKQEVENSTLKKSSKSNHLSTLALLGEFKKDLCFADLTFEFITSFECFLRSKGYHINTIAKHMKHLKRQVNIAINKDYMKMREYPFRKYKIKTVANKHTHLTPEELERLEYLPLMGKAAKYRKTLDAFLFCCYTGIRFSDFINLSSDNIVEIYRETWLVYRTVKTDTEVRLPLFLLFDGKALGILDKYKDAPDCFYQLKNNSNVNKELIMLARLANLGKRISFHTARHTNATLLIYKGVNITTVQKLLGHKNLKTTQVYADVMDMTIVQDLKKNSEHPINEPGRCTHDK	WP_106069232.1	GCF_002998535.1	NZ_CP027234.1	1759842	1761041	-	399	992;1382	2	Prevotella heparinolytica strain F0111	AGTACCGCAAAGACTTTGCAGA	AGTTCCGCAAAGACTTTGCAGA
GCF_017309675.2_ASM1730967v2	71.429	Bacteroides	humanifaecis	MSKIIYNLVYNRKRSLNKKGMALVQVEAYLDRKKKYFSTKVYLKPEQWDNKKLIVKNHPNADALNRLIYEFMAMIEKKELELWQQGRRISLELLKDVLSTSENKTSFISFCRQEIANSALKESTKRNHLSTLSLLQQFKKDVTFSDLTFEFISSFEYFLQSRGYHTNTIAKHMKHLKRHINVAINKDYIEIQKYAFRKYKIKTIENKHTHLSPEELEKLEKLSLAGRYTKLQKTLDAFLFCCYAGMRYSDFISLSPDNIVEIRQETWLIYKSIKTSTEVRLPLYLLFEGKGLVILDKYRDDLQSFFHLRDNSNVNKNLIVISRLAGLSKKISFHTARHTNATLLIYNGVNITTVQKLLGHKSVKTTQVYTNVMDMTIVHDLEKSHALMPLPKKTRT	WP_131225754.1	GCF_017309675.2	NZ_CP084680.1	1701259	1702449	-	396	257;218;694;218;290;199	6	Bacteroides humanifaecis strain KGMB07931	AGTTCCGCGAAAACTCTGGTGA	AGTTCCGCGAAAACTCTGCTAA	AGTTCCGCGAAAACTCTGGTAA	AGTTCCGCGAAAACTCTGGTGA	AGTTCCGCGAAAACTCTGGTAA
GCF_020550085.1_ASM2055008v1	71.429	Bacteroides	humanifaecis	MSKIIYNLVYNRKRSLNKKGMALVQVEAYLDRKKKYFSTKVYLKPEQWDNKKLIVKNHPNADALNRLIYEFMAMIEKKELELWQQGRRISLELLKDVLSTSENKTSFISFCRQEIANSALKESTKRNHLSTLSLLQQFKKDVTFSDLTFEFISSFEYFLQSRGYHTNTIAKHMKHLKRHINVAINKDYIEIQKYAFRKYKIKTIENKHTHLSPEELEKLEKLSLAGRYTKLQKTLDAFLFCCYAGMRYSDFISLSPDNIVEIRQETWLIYKSIKTSTEVRLPLYLLFEGKGLVILDKYRDDLQSFFHLRDNSNVNKNLIVISRLAGLSKKISFHTARHTNATLLIYNGVNITTVQKLLGHKSVKTTQVYTNVMDMTIVHDLEKSHALMPLPKKTRT	WP_131225754.1	GCF_020550085.1	NZ_CP085132.1	1695489	1696679	-	396	257;694;218;290;694;290;199	7	Bacteroides humanifaecis strain KGMB10229	AGTTCCGCGAAAACTCTGGTGA	AGTTCCGCGAAAACTCTGGTAA	AGTTCCGCGAAAACTCTGGTGA	AGTTCCGCGAAAACTTTGGTGA	AGTTCCGCGAAAACTCTGGTAA	AGTTCCGCGAAAACTTTGGTGA	AGTTCCGCGAAAACTCTGGTAA
GCF_004328515.1_ASM432851v1	71.429	Bacteroides	humanifaecis	MSKIIYNLVYNRKRSLNKKGMALVQVEAYLDRKKKYFSTKVYLKPEQWDNKKLIVKNHPNADALNRLIYEFMAMIEKKELELWQQGRRISLELLKDVLSTSENKTSFISFCRQEIANSALKESTKRNHLSTLSLLQQFKKDVTFSDLTFEFISSFEYFLQSRGYHTNTIAKHMKHLKRHINVAINKDYIEIQKYAFRKYKIKTIENKHTHLSPEELEKLEKLSLAGRYTKLQKTLDAFLFCCYAGMRYSDFISLSPDNIVEIRQETWLIYKSIKTSTEVRLPLYLLFEGKGLVILDKYRDDLQSFFHLRDNSNVNKNLIVISRLAGLSKKISFHTARHTNATLLIYNGVNITTVQKLLGHKSVKTTQVYTNVMDMTIVHDLEKSHALMPLPKKTRT	WP_131225754.1	GCF_004328515.1	NZ_CP036491.1	2821544	2822734	-	396	257;290;326;218;199	5	Bacteroides sp. A1C1	AGTTCCGCGAAAACTCTGGTGA	AGTTCCGCGAAAACTTTGGTGA	AGTTCCGCGAAAACTCTGCTAA	AGTTCCGCGAAAACTCTGGTGA	AGTTCCGCGAAAACTCTGGTAA
GCF_013874375.1_ASM1387437v1	71.354	Bacteroides	humanifaecis	MSKIIYNLVYNRKRSLNKKGMALVQVEAYLDRKKKYFSTKVYLKPEQWDNKKLIVKNHPNADALNRLIYEFMAMIEKKELELWQQGRRISLELLKEVLSTNENKTSFISFCRQEIANSALKESTKRNHLSTLSLLQQFKKDVTFSDLTFEFISSFEYFLQSRGYHTNTIAKHMKHLKRHINVAINKDYIEIQKYAFRKYKIKTIENKHTHLSPEELEKLEKLSLAGRYTKLQKTLDAFLFCCYAGMRYSDFISLSPDNIVEIRQETWLIYKSIKTSTEVRLPLYLLFEGKGLVILDKYRDDLQSFFHLRDNSNVNKNLIVISRLAGLSKKISFHTARHTNATLLIYNGVNITTVQKLLGHKSVKTTQVYTNVMDMTIVHDLEKNHALMPLPKKTRT	WP_117599260.1	GCF_013874375.1	NZ_CP059408.1	37581	38771	-	396	257;326;321;218;199	5	Bacteroides sp. CACC 737	AGTTCCGCGAAAACTCTGGTGA	AGTTCCGCGAAAACTCTGCTAA	AGTTCCGCGAAAACTCTGGTAA	AGTTCCGCGAAAACTCTGGTGA	AGTTCCGCGAAAACTCTGGTAA
GCF_015679285.1_ASM1567928v1	71.354	Bacteroides	humanifaecis	MSKIIYNLVYNRKRSLNKKGMALVQVEAYLDRKKKYFSTKVYLKPEQWDNKKLIVKNHPNADALNRLIYEFMAMIEKKELELWQQGRRISLELLKEVLSTNENKTSFISFCRQEIANSALKESTKRNHLSTLSLLQQFKKDVTFSDLTFEFISSFEYFLQSRGYHTNTIAKHMKHLKRHINVAINKDYIEIQKYAFRKYKIKTIENKHTHLSPEELEKLEKLSLAGRYTKLQKTLDAFLFCCYAGMRYSDFISLSPDNIVEIRQETWLIYKSIKTSTEVRLPLYLLFEGKGLVILDKYRDDLQSFFHLRDNSNVNKNLIVISRLAGLSKKISFHTARHTNATLLIYNGVNITTVQKLLGHKSVKTTQVYTNVMDMTIVHDLEKNHALMPLPKKTRT	WP_117599260.1	GCF_015679285.1	NZ_CP064937.1	1622422	1623612	+	396	199;326;218	3	Bacteroides sp. HF-162	AGTTCCGCGAAAACTCTGGTGA	AGTTCCGCGAAAACTCTGCTAA	AGTTCCGCGAAAACTCTGGTGA
GCF_003363675.2_ASM336367v2	71.244	Bacteroides	intestinalis	MNKIIYSLVYNRKKSLNKKGMALVQVEAYLNRRKKYFSTKVYLRPDQWDAKKLLVKNHPNADALNRLIYEFVAMIEKRELELWQQGKTINLDVLKDVLSEKQEQEDKFSFIPFFKQEVMTSGLKESTKRNHLSTLALLQDFKKNVTFSDLTFEFVSSFEYFLQSKGYHTNTIAKHMKHLKRHINVAINKEYMDIQKYAFRKYKIKTVENGHTHLSPEELEKLETLQLKGRYTKYQKTLDAFLFCCYAGMRYSDFVNMKPDNIVEMHQETWLIYKSIKTGTEVRLPLYLLFSGKGILILNKYQANLQDFFHLRDNSNVNKELIIIARLAGVAKKVSFHTARHTNATLLIYNGVNITTVQKLLGHKSVKTTQIYTNVMDATIISDLEKNHSSVHRKKGK	WP_115501970.1	GCF_003363675.2	NZ_CP041379.1	2450123	2451316	+	397	655;355;175;422;569	5	Bacteroides intestinalis strain APC919/174	AGTTCTGCGAAGACTTTGCAGG	AGTTCTGCGAAAACGCTTCAGA	AGTTCTGCGAAGACATTGCAAA	AGTTCTGCGAAGACTTTGCAGG	AGTTCTGCGAAGACTTTGCAGA
GCF_009193295.2_ASM919329v2	81.313	Bacteroides	luhongzhouii	MEKISYNLVFNRKKRLNKKGMALVQVEAYLNRKKMYFSTKIYLKPDQWDTKRKMVKNHPNANVLNRMLYENIAAIEHTELGLWQQGKPISLDLLKNSIDKPLSNGKSFLTFFKEEVANSLLKESTRQNHLSTLELLQGFKKEILFTDLTFEFVSEFDNHLQSKGYHLNTIAKHMKHLKRYINVAINKEYMDIQKYAFRKYKIKSIEGSHTHLAPEELYRFENLQLKGRYTRLQKTKDAFLFCCYAGLRYSDFTSLTSANIVEFHQETWIIYKSVKTGIEVRLPLYLLFEGKGIEILQRYKDDLDSFFKLKDNSNINKELNLLAGLAKIDKRVSFHTARHTNATLLLYSGANITTVQKLLGHKSVKTTQVYANIMDITVVRDLEKTASSKNNNRYKS	WP_143257651.1	GCF_009193295.2	NZ_CP059973.1	198885	200075	-	396	23;977	2	Bacteroides luhongzhouii strain HF-5141	AGTTCTGCAAAGACTTTGCAAA	AGTTCTGCAAAGACTTTGCAAA
GCF_019930665.1_ASM1993066v1	72.494	Bacteroides	nordii	MEKIIYNLVFNRKKNLNKRGMALVQIEAYLNRKKKYFSTKVYLKPDQWDAKRRRVRNHPNAEALNRMIYEYMAEIEKKELGMWQQNKSISLDALKDALVTSPGEEESFLAFFRKEILNSRLKESTKQNHLSTLELLRKYKKDISFTELTFEFISSFDQYLQSKGYHVNTIAKHMKHLKRHINVAINKEYMEVQKYAFRKYKIKSVENKHTHLSPDELYKIEKLNLGDKYERLEKTKDAFLFCCYAGMRYSDFVNLTAENIVKIQKDTWLIYKTIKTRIEVRLPLYLLFKGKGLQILNKYQDNLSDFFKLRDNSNVNKELLIISRLAGINKKVSFHTARHTNATLLIYNGVNITTVQKLLGHKSVKTTQVYTNVMDMTIVRDLEKAKSTKRSPL	WP_025868343.1	GCF_019930665.1	NZ_CP082886.1	9399	10580	-	393	517;931	2	Bacteroides nordii strain FDAARGOS_1461	AGTTCTGCAAAGACTTTGCAGA	AGTTCTGCAAAGACTTTGCAAA
GCF_025914175.1_ASM2591417v1	72.494	Bacteroides	nordii	MEKIIYNLVFNRKKNLNKRGMALVQIEAYLNRKKKYFSTKVYLKPDQWDAKRRRVRNHPNAEALNRMIYEYMAEIEKKELGMWQQNKSISLDALKDALVTSPGEEESFLAFFRKEILNSRLKESTKQNHLSTLELLRKYKKDISFTELTFEFISSFDQYLQSKGYHVNTIAKHMKHLKRHINVAINKEYMEVQKYAFRKYKIKSVENKHTHLSPDELYKIEKLNLGDKYERLEKTKDAFLFCCYAGMRYSDFVNLTAENIVKIQKDTWLIYKTIKTRIEVRLPLYLLFKGKGLQILNKYQDNLSDFFKLRDNSNVNKELLIISRLAGINKKVSFHTARHTNATLLIYNGVNITTVQKLLGHKSVKTTQVYTNVMDMTIVRDLEKAKSTKRSPL	WP_025868343.1	GCF_025914175.1	NZ_CP083676.1	624140	625321	-	393	422;931;355;517	4	Bacteroides nordii strain WAL7935	AGTTCTGCAAAGACTTTGCAGA	AGTTCTGCAAAGACTTTGCAGA	AGTTCTGCAAAAACTTTGCAGA	AGTTCTGCAAAGACTTTGCAGA
GCF_001314995.1_ASM131499v1	82.262	Bacteroides	ovatus	MEKISYNLVFNRKKRLNKRGMALVQVEAYLNRKKMYFSTKIYLKPEQWDAKRKMVKNHPNANVLNRMLYENIAAIEQTELGLWQQGKSISLDLLKNSIDKPLSNGRSFLTFFKEEIANSSLKESTRQNHLSTLELLQEFKKEVLFTDLTFEFVSSFDNYLQSKGYHLNTIAKHMKHLKRYINVAINKEYMDIQKYAFRKYKIKSIEGSHTHLAPEELHKFENLQLTGRYTRLQKTKDAFLFCCYAGLRYSDFTNLTSANIVEFHQETWIIYKSVKTGMEVRLPLYLLFEGKGIQILQRYKDDFNSFFKLKDNSNINKELNILAGLAKIDKRVSFHTARHTNATLLLYNGANITTVQKLLGHKSVKTTQVYANIMDITVVRDLEKTASSKK	WP_004299185.1	GCF_001314995.1	NZ_CP012938.1	2850841	2852013	+	390	23;222	2	Bacteroides ovatus strain ATCC 8483	AGTTCTGCAAAGACTTTGCAGA	AGTTCTGCAAAGACTTTGCAGA
GCF_007012325.1_ASM701232v1	82.519	Bacteroides	ovatus	MEKISYNLVFNRKKRLNKRGMALVQVEAYLNRKKMYFSTKIYLKPEQWDAKRKMVKNHPNANVLNRMLYENIAAIEQTELGLWQQGKSISLDLLKNSIDKPLSNGRSFLTFFKEEIANSSLKESTRQNHLSTLELLQEFKKEVLFTDLTFEFVSSFDNYLQSKGYHLNTIAKHMKHLKRYINVAINKEYMDIQKYAFRKYKIKSIEGSHTHLAPEELHKFENLQLTGRYTRLQKTKDAFLFCCYAGLRYSDFTNLTSANIVEFHQETWIIYKSVKTGMEVRLPLYLLFEGKGIQILQRYKDDLNSFFKLKDNSNINKELNILAGLAKIDKRVSFHTARHTNATLLLYNGANITTVQKLLGHKSVKTTQVYANIMDITVVRDLEKTASSKK	WP_004326266.1	GCF_007012325.1	NZ_CP041395.1	3017497	3018669	-	390	23;222;107	3	Bacteroides ovatus strain 3725 D1	AGTTCTGCAAAGACTTTGCAGA	AGTTCTGCAAAGACTTTGCAGA	AGTTCTGCAAAGACTTTGCAGA
GCF_009734165.1_ASM973416v1	82.262	Bacteroides	ovatus	MEKISYNLVFNRKKRLNKRGMALVQVEAYLNRKKLYFSTKIYLKPEQWDAKRKMVKNHPNANVLNRMLYENIAAIEQTELGLWQQGKSISLDLLKNSIDKPLSNGRSFLTFFKEEIANSSLKESTRQNHLSTLELLQEFKKEVLFTDLTFEFVSSFDNYLQSKGYHLNTIAKHMKHLKRYINVAINKEYMDIQKYAFRKYKIKSIEGSHTHLAPEELHKFENLQLTGRYTRLQKTKDAFLFCCYAGLRYSDFTNLTSANIVEFHQETWIIYKSVKTGMEVRLPLYLLFEGKGIQILQRYKDDLNSFFKLKDNSNINKELNILAGLAKIDKRVSFHTARHTNATLLLYNGANITTVQKLLGHKSVKTTQVYANIMDITVVRDLEKTASSKK	WP_004306513.1	GCF_009734165.1	NZ_CP046397.1	3287787	3288959	+	390	701;107;696	3	Bacteroides ovatus strain FDAARGOS_733	AGTTCTGCAAAGACTTTGCAGA	AGTTCTGCAAAGACTTTGCAGA	no motif
GCF_016894185.1_ASM1689418v1	82.262	Bacteroides	ovatus	MEKISYNLVFNRKKRLNKRGMALVQVEAYLNRKKMYFSTKIYLKPEQWDAKRKMVKNHPNANVLNRMLYENIAAIEQTELGLWQQGKSISLDLLKNSIDKPLSNGRSFLTFFKEEIANSSLKESTRQNHLSTLELLQEFKKEVLFTDLTFEFVSSFDNYLQSKGYHLNTIAKHMKHLKRYINVAINKEYMDIQKYAFRKYKIKSIEGSHTHLAPEELHKFENLQLTGRYTRLQKTKDAFLFCCYAGLRYSDFTNLTSANIVEFHQETWIIYKSVKTGMEVRLPLYLLFEGKGIQILQRYKDDFNSFFKLKDNSNINKELNILAGLAKIDKRVSFHTARHTNATLLLYNGANITTVQKLLGHKSVKTTQVYANIMDITVVRDLEKTASSKK	WP_004299185.1	GCF_016894185.1	NZ_CP069790.1	2447791	2448963	+	390	222;23	2	Bacteroides ovatus strain FDAARGOS_1235	AGTTCTGCAAAGACTTTGCAGA	AGTTCTGCAAAGACTTTGCAGA
GCF_018292045.1_ASM1829204v1	82.519	Bacteroides	ovatus	MEKISYNLVFNRKKRLNKRGMALVQVEAYLNRKKMYFSTKIYLKPEQWDAKRKMVKNHPNANVLNRMLYENIAAIEQTELGLWQQGKSISLDLLKNSIDKPLSNGRSFLTFFKEEIANSSLKESTRQNHLSTLELLQEFKKEVLFTDLTFEFVSSFDNYLQSKGYHLNTIAKHMKHLKRYINVAINKEYMDIQKYAFRKYKIKSIEGSHTHLAPEELHKFENLQLTGRYTRLQKTKDAFLFCCYAGLRYSDFTNLTSANIVEFHQETWIIYKSVKTGMEVRLPLYLLFEGKGIQILQRYKDDLNSFFKLKDNSNINKELNILAGLAKIDKRVSFHTARHTNATLLLYNGANITTVQKLLGHKSVKTTQVYANIMDITVVRDLEKTASSKK	WP_004326266.1	GCF_018292045.1	NZ_CP072244.1	2781248	2782420	-	390	107;222;23	3	Bacteroides ovatus strain CL06T03C20	AGTTCTGCAAAGACTTTGCAGA	AGTTCTGCAAAGACTTTGCAGA	AGTTCTGCAAAGACTTTGCAGA
GCF_020091525.1_ASM2009152v1	82.262	Bacteroides	ovatus	MEKISYNLVFNRKKRLNKRGMALVQVEAYLNRKKMYFSTKIYLKPEQWDAKRKMVKNHPNANVLNRMLYENIAAIEQTELGLWQQGKSISLDLLKNSIDKPLSNGRSFLTFFKEEIANSSLKESTRQNHLSTLELLQEFKKEVLFTDLTFEFVSSFDNYLQSKGYHLNTIAKHMKHLKRYINVAINKEYMDIQKYAFRKYKIKSIEGSHTHLAPEELHKFENLQLTGRYTRLQKTKDAFLFCCYAGLRYSDFTNLTSANIVEFHQETWIIYKSVKTGMEVRLPLYLLFEGKGIQILQRYKDDFNSFFKLKDNSNINKELNILAGLAKIDKRVSFHTARHTNATLLLYNGANITTVQKLLGHKSVKTTQVYANIMDITVVRDLEKTASSKK	WP_004299185.1	GCF_020091525.1	NZ_CP081917.1	2781603	2782775	-	390	222;23	2	Bacteroides ovatus strain BFG-107	AGTTCTGCAAAGACTTTGCAGA	AGTTCTGCAAAGACTTTGCAGA
GCF_020149745.1_ASM2014974v1	82.262	Bacteroides	ovatus	MEKISYNLVFNRKKRLNKRGMALVQVEAYLNRKKMYFSTKIYLKPEQWDAKRKMVKNHPNANVLNRMLYENIAAIEQTELGLWQQGKSISLDLLKNSIDKPLSNGRSFLTFFKEEIANSSLKESTRQNHLSTLELLQEFKKEVLFTDLTFEFVSSFDNYLQSKGYHLNTIAKHMKHLKRYINVAINKEYMDIQKYAFRKYKIKSIEGSHTHLAPEELHKFENLQLTGRYTRLQKTKDAFLFCCYAGLRYSDFTNLTSANIVEFHQETWIIYKSVKTGMEVRLPLYLLFEGKGIQILQRYKDDFNSFFKLKDNSNINKELNILAGLAKIDKRVSFHTARHTNATLLLYNGANITTVQKLLGHKSVKTTQVYANIMDITVVRDLEKTASSKK	WP_004299185.1	GCF_020149745.1	NZ_CP083813.1	2226540	2227712	+	390	222;23	2	Bacteroides ovatus strain FDAARGOS_1516	AGTTCTGCAAAGACTTTGCAGA	AGTTCTGCAAAGACTTTGCAGA
GCF_024759225.1_ASM2475922v1	82.519	Bacteroides	ovatus	MEKISYNLVFNRKKRLNKRGMALVQVEAYLNRKKMYFSTKIYLKPEQWDAKRKMVKNHPNANVLNRMLYENIAAIEQTELGLWQQGKSISLDLLKNSIDKPLSNGRSFLTFFKEEIANSSLKESTRQNHLSTLELLQEFKKEVLFTDLTFEFVSSFDNYLQSKGYHLNTIAKHMKHLKRYINVAINKEYMDIQKYAFRKYKIKSIEGSHTHLAPEELHKFENLQLTGRYTRLQKTKDAFLFCCYAGLRYSDFTNLTSANIVEFHQETWIIYKSVKTGMEVRLPLYLLFEGKGIQILQRYKDDLNSFFKLKDNSNINKELNILAGLAKIDKRVSFHTARHTNATLLLYNGANITTVQKLLGHKSVKTTQVYANIMDITVVRDLEKTASSKK	WP_004326266.1	GCF_024759225.1	NZ_CP103100.1	5641293	5642465	-	390	107;1058	2	Bacteroides ovatus strain BFG-179	AGTTCTGCAAAGACTTTGCAGA	AGTTCTGCAAAGACTTTGCAGA
GCF_024759245.1_ASM2475924v1	82.519	Bacteroides	ovatus	MEKISYNLVFNRKKRLNKRGMALVQVEAYLNRKKMYFSTKIYLKPEQWDAKRKMVKNHPNANVLNRMLYENIAAIEQTELGLWQQGKSISLDLLKNSIDKPLSNGRSFLTFFKEEIANSSLKESTRQNHLSTLELLQEFKKEVLFTDLTFEFVSSFDNYLQSKGYHLNTIAKHMKHLKRYINVAINKEYMDIQKYAFRKYKIKSIEGSHTHLAPEELHKFENLQLTGRYTRLQKTKDAFLFCCYAGLRYSDFTNLTSANIVEFHQETWIIYKSVKTGMEVRLPLYLLFEGKGIQILQRYKDDLNSFFKLKDNSNINKELNILAGLAKIDKRVSFHTARHTNATLLLYNGANITTVQKLLGHKSVKTTQVYANIMDITVVRDLEKTASSKK	WP_004326266.1	GCF_024759245.1	NZ_CP103210.1	137569	138741	-	390	23;107	2	Bacteroides ovatus strain BFG-258	AGTTCTGCAAAGACTTTGCAGA	AGTTCTGCAAAGACTTTGCAGA
GCF_024759785.1_ASM2475978v1	82.519	Bacteroides	ovatus	MEKISYNLVFNRKKRLNKRGMALVQVEAYLNRKKMYFSTKIYLKPEQWDAKRKMVKNHPNANVLNRMLYENIAAIEQTELGLWQQGKSISLDLLKNSIDKPLSNGRSFLTFFKEEIANSSLKESTRQNHLSTLELLQEFKKEVLFTDLTFEFVSSFDNYLQSKGYHLNTIAKHMKHLKRYINVAINKEYMDIQKYAFRKYKIKSIEGSHTHLAPEELHKFENLQLTGRYTRLQKTKDAFLFCCYAGLRYSDFTNLTSANIVEFHQETWIIYKSVKTGMEVRLPLYLLFEGKGIQILQRYKDDLNSFFKLKDNSNINKELNILAGLAKIDKRVSFHTARHTNATLLLYNGANITTVQKLLGHKSVKTTQVYANIMDITVVRDLEKTASSKK	WP_004326266.1	GCF_024759785.1	NZ_CP103191.1	139195	140367	+	390	1102;222;107	3	Bacteroides ovatus strain BFG-224	AGTTCTGCAAAGACTTTGCAGA	AGTTCTGCAAAGACTTTGCAGA
GCF_025146775.1_ASM2514677v1	82.262	Bacteroides	ovatus	MEKISYNLVFNRKKRLNKRGMALVQVEAYLNRKKMYFSTKIYLKPEQWDAKRKMVKNHPNANVLNRMLYENIAAIEQTELGLWQQGKSISLDLLKNSIDKPLSNGRSFLTFFKEEIANSSLKESTRQNHLSTLELLQEFKKEVLFTDLTFEFVSSFDNYLQSKGYHLNTIAKHMKHLKRYINVAINKEYMDIQKYAFRKYKIKSIEGSHTHLAPEELHKFENLQLTGRYTRLQKTKDAFLFCCYAGLRYSDFTNLTSANIVEFHQETWIIYKSVKTGMEVRLPLYLLFEGKGIQILQRYKDDFNSFFKLKDNSNINKELNILAGLAKIDKRVSFHTARHTNATLLLYNGANITTVQKLLGHKSVKTTQVYANIMDITVVRDLEKTASSKK	WP_004299185.1	GCF_025146775.1	NZ_CP102259.1	142149	143321	+	390	23;222	2	Bacteroides ovatus strain ATCC 8483	AGTTCTGCAAAGACTTTGCAGA	AGTTCTGCAAAGACTTTGCAGA
GCF_030168555.1_ASM3016855v1	82.519	Bacteroides	ovatus	MEKISYNLVFNRKKRLNKRGMALVQVEAYLNRKKMYFSTKIYLKPEQWDTKRKMVKNHPNANVLNRMLYENIAAIEQTELGLWQQGKSISLDLLKNSIDKPLSNGRSFLTFFKEEIANSSLKESTRQNHLSTLELLQEFKKEVLFTDLTFEFVSSFDNYLQSKGYHLNTIAKHMKHLKRYINVAINKEYMDIQKYAFRKYKIKSIEGSHTHLAPEELHKFENLQLTGRYTRLQKTKDAFLFCCYAGLRYSDFTNLTSANIVEFHQETWIIYKSVKTGMEVRLPLYLLFEGKGIQILQRYKDDLNSFFKLKDNSNINKELNILAGLAKIDKRVSFHTARHTNATLLLYNGANITTVQKLLGHKSVKTTQVYANIMDITVVRDLEKTASSKK	WP_008650053.1	GCF_030168555.1	NZ_CP113514.1	4945447	4946619	+	390	23;107	2	Bacteroides ovatus strain CP926	AGTTCTGCAAAGACTTTGCAGA	AGTTCTGCAAAGACTTTGCAGA
GCF_038561945.1_B_ovatus_H2495	82.519	Bacteroides	ovatus	MEKISYNLVFNRKKRLNKRGMALVQVEAYLNRKKMYFSTKIYLKPEQWDAKRKMVKNHPNANVLNRMLYENIAAIEQTELGLWQQGKSISLDLLKNSIDKPLSNGRSFLTFFKEEIANSSLKESTRQNHLSTLELLQEFKKEVLFTDLTFEFVSSFDNYLQSKGYHLNTIAKHMKHLKRYINVAINKEYMDIQKYAFRKYKIKSIEGSHTHLAPEELHKFENLQLTGRYTRLQKTKDAFLFCCYAGLRYSDFTNLTSANIVEFHQETWIIYKSVKTGMEVRLPLYLLFEGKGIQILQRYKDDLNSFFKLKDNSNINKELNILAGLAKIDKRVSFHTARHTNATLLLYNGANITTVQKLLGHKSVKTTQVYANIMDITVVRDLEKTASSKK	WP_004326266.1	GCF_038561945.1	NZ_CP134818.1	2846600	2847772	+	390	701;977;696	3	Bacteroides ovatus strain H-2495	AGTTCTGCAAAGACTTTGCAGA	AGTTCTGCAAAGACTTTGCAAG	no motif
GCF_900095495.1_B_ovatus_V975	82.519	Bacteroides	ovatus	MEKISYNLVFNRKKRLNKRGMALVQVEAYLNRKKMYFSTKIYLKPEQWDAKRKMVKNHPNANVLNRMLYENIAAIEQTELGLWQQGKSISLDLLKNSIDKPLSNGRSFLTFFKEEIANSSLKESTRQNHLSTLELLQEFKKDVLFTDLTFEFVSSFDNYLQSKGYHLNTIAKHMKHLKRYINVAINKEYMDIQKYAFRKYKIKSIEGSHTHLAPEELHKFENLQLTGRYTRLQKTKDAFLFCCYAGLRYSDFTNLTSANIVEFHQETWIIYKSVKTGMEVRLPLYLLFEGKGIQILQRYKDDFNSFFKLKDNSNINKELNILAGLAKIDKRVSFHTARHTNATLLLYNGANITTVQKLLGHKSVKTTQVYANIMDITVVRDLEKTASSKK	WP_070275797.1	GCF_900095495.1	NZ_LT622246.1	142147	143319	+	390	23;222	2	Bacteroides ovatus V975	AGTTCTGCAAAGACTTTGCAGA	AGTTCTGCAAAGACTTTGCAGA
GCF_918258265.1_BOVAC1	82.519	Bacteroides	ovatus	MEKISYNLVFNRKKRLNKRGMALVQVEAYLNRKKMYFSTKIYLKPEQWDAKRKMVKNHPNANVLNRMLYENIAAIEQTELGLWQQGKSISLDLLKNSIDKPLSNGRSFLTFFKEEIANSSLKESTRQNHLSTLELLQEFKKEVLFTDLTFEFVSSFDNYLQSKGYHLNTIAKHMKHLKRYINVAINKEYMDIQKYAFRKYKIKSIEGSHTHLAPEELHKFENLQLTGRYTRLQKTKDAFLFCCYAGLRYSDFTNLTSANIVEFHQETWIIYKSVKTGMEVRLPLYLLFEGKGIQILQRYKDDLNSFFKLKDNSNINKELNILAGLAKIDKRVSFHTARHTNATLLLYNGANITTVQKLLGHKSVKTTQVYANIMDITVVRDLEKTASSKK	WP_004326266.1	GCF_918258265.1	NZ_OU901070.1	5427897	5429069	+	390	107;222;23	3	Bacteroides ovatus strain VPIC145	AGTTCTGCAAAGACTTTGCAGA	AGTTCTGCAAAGACTTTGCAGA	AGTTCTGCAAAGACTTTGCAGA
GCF_014334015.1_ASM1433401v1	81.566	Bacteroides	ovatus	MEKISYNLVFNRKKRLNKRGMALVQVEAYLNRKKMYFSTKIYLKPEQWDAKRKMVKNHPNANVLNRMLYENIAAIEQTELGLWQQGKSISLDLLKNSIDKPLSNGRSFLTFFKEEIANSSLKESTRQNHLSTLELLQEFKKEVLFTDLTFEFVSSFDNYLQSKGYHLNTIAKHMKHLKRYINVAINKEYMDIQKYAFRKYKIKSIEGSHTHLAPEELHKFENLQLTGRYTRLQKTKDAFLFCCYAGLRYSDFTNLTSANIVEFHQETWIIYKSVKTGMEVRLPLYLLFEGKGIQILQRYKDDLNSFFKLKDNSNINKELNILAGLAKIDKRVSFHTARHTNATLLLYNGANITTVQKLLGHKSVKTTQVYANIMDITVVRDLEKTASSKNNNKHKN	WP_117934400.1	GCF_014334015.1	NZ_CP060488.1	157696	158886	-	396	701;222;107	3	Bacteroides sp. M10	AGTTCTGCAAAGACTTTGCAGA	AGTTCTGCAAAGACTTTGCAGA	AGTTCTGCAAAGACTTTGCAGA
GCF_025147085.1_ASM2514708v1	82.262	Bacteroides	ovatus	MEKISYNLVFNRKKRLNKRGMALVQVEAYLNRKKMYFSTKIYLKPEQWDAKRKMVKNHPNANVLNRMLYENIAAIEQTELGLWQQGKSIWLDLLKNSIDKPLSNGRSFLTFFKEEIANSSLKESTRQNHLSTLELLQEFKKEVLFTDLTFEFVSSFDNYLQSKGYHLNTIAKHMKHLKRYINVAINKEYMDIQKYAFRKYKIKSIEGSHTHLAPEELHKFENLQLTGRYTRLQKTKDAFLFCCYAGLRYSDFTNLTSANIVEFHQETWIIYKSVKTGMEVRLPLYLLFEGKGIQILQRYKDDLNSFFKLKDNSNINKELNILAGLAKIDKRVSFHTARHTNATLLLYNGANITTVQKLLGHKSVKTTQVYANIMDITVVRDLEKTASSKK	WP_008998961.1	GCF_025147085.1	NZ_CP102261.1	133420	134592	-	390	701;222;107;696	4	Bacteroides sp. D2	AGTTCTGCAAAGACTTTGCAGA	AGTTCTGCAAAGACTTTGCAGA	AGTTCTGCAAAGACTTTGCAGA	no motif
GCF_025914115.1_ASM2591411v1	82.519	Bacteroides	ovatus	MEKISYNLVFNRKKRLNKRGMALVQVEAYLNRKKMYFSTKIYLKPEQWDAKRKMVKNHPNANVLNRMLYENIAAIEQTELGLWQQGKSISLDLLKNSIDKPLSNGRSFLTFFKEEIANSSLKESTRQNHLSTLELLQEFKKEVLFTDLTFEFVSSFDNYLQSKGYHLNTIAKHMKHLKRYINVAINKEYMDIQKYAFRKYKIKSIEGSHTHLAPEELHKFENLQLTGRYTRLQKTKDAFLFCCYAGLRYSDFTNLTSANIVEFHQETWIIYKSVKTGMEVRLPLYLLFEGKGIQILQRYKDDLNSFFKLKDNSNINKELNILAGLAKIDKRVSFHTARHTNATLLLYNGANITTVQKLLGHKSVKTTQVYANIMDITVVRDLEKTASSKK	WP_004326266.1	GCF_025914115.1	NZ_CP083673.1	1377073	1378245	+	390	23;107	3	Bacteroides sp. DH3716P	AGTTCTGCAAAGACTTTGCAGA	AGTTCTGCAAAGACTTTGCAGA
GCF_018291945.1_ASM1829194v1	71.208	Bacteroides	salyersiae	MEKIIYNLVFNRKKSLNKKGMALVQIEAYLNRKKKYFSTKVYLKPEQWDAKRRRVRNHPNADAINRMIYEYMAEIEKKELGLWQQRKTVTLDALKEALVSVQEEEESFLAFFRKEIINSRLKESTKQNHLSTLELLREYKKDVSFTELTFEFISSFDQYLQAKGYHVNTIAKHMKHLKRHINTAINKEYMEIQKYAFRKYKIKSVENNHTHLSPDELNKIEKLDLGDRYTRLEKTKDAFLFCCYAGLRYSDFVNLSSENIVKIQKDTWLIYKTIKTRIEVRLPLYLLFKGKGLEILNKYQNNLSDFFNLRDNSNVNKELIIISRLAGIHKKISFHTARHTNATLLIYNGVNITTVQKLLGHKSVKTTQVYTNVMDMTIVRDLEKAKSTKRSPV	WP_007478783.1	GCF_018291945.1	NZ_CP072243.1	5545071	5546252	+	393	568;422;355;539	4	Bacteroides salyersiae strain CL06T03C19	AGTTCTGCAAAGACTTTGCAAA	AGTTCTGCAAAGACTTTGCAGA	AGTTCTGCAAAGACTTTGCAGA	AGTTCTGCAAAGACTTTGCAAA
GCF_020091345.1_ASM2009134v1	71.208	Bacteroides	salyersiae	MEKIIYNLVFNRKKSLNKKGMALVQIEAYLNRKKKYFSTKVYLKPEQWDAKRRRVRNHPNADAINRMIYEYMAEIEKKELGLWQQRKTVTLDALKEALVSVQEEEESFLAFFRKEIINSRLKESTKQNHLSTLELLREYKKDVSFTELTFEFISSFDQYLQAKGYHVNTIAKHMKHLKRHINTAINKEYMEIQKYAFRKYKIKSVENNHTHLSPDELNKIEKLDLGDRYTRLEKTKDAFLFCCYAGLRYSDFVNLSSENIVKIQKDTWLIYKTIKTRIEVRLPLYLLFKGKGLEILNKYQNNLSDFFNLRDNSNVNKELIIISRLAGIHKKISFHTARHTNATLLIYNGVNITTVQKLLGHKSVKTTQVYTNVMDMTIVRDLEKAKSTKRSPV	WP_007478783.1	GCF_020091345.1	NZ_CP081899.1	1788912	1790093	+	393	539;422;355;568	4	Bacteroides salyersiae strain BFG-288	AGTTCTGCAAAGACTTTGCAAA	AGTTCTGCAAAGACTTTGCAGA	AGTTCTGCAAAGACTTTGCAAA	AGTTCTGCAAAGACTTTGCAGA
GCF_020091385.1_ASM2009138v1	71.208	Bacteroides	salyersiae	MEKIIYNLVFNRKKSLNKKGMALVQIEAYLNRKKKYFSTKVYLKPEQWDAKRRRVRNHPNADAINRMIYEYMAEIEKKELGLWQQRKTVTLDALKEALVSVQEEEESFLAFFRKEIINSRLKESTKQNHLSTLELLREYKKDVSFTELTFEFISSFDQYLQAKGYHVNTIAKHMKHLKRHINTAINKEYMEIQKYAFRKYKIKSVENNHTHLSPDELNKIEKLDLGDRYTRLEKTKDAFLFCCYAGLRYSDFVNLSSENIVKIQKDTWLIYKTIKTRIEVRLPLYLLFKGKGLEILNKYQNNLSDFFNLRDNSNVNKELIIISRLAGIHKKISFHTARHTNATLLIYNGVNITTVQKLLGHKSVKTTQVYTNVMDMTIVRDLEKAKSTKRSPV	WP_007478783.1	GCF_020091385.1	NZ_CP081902.1	1986198	1987379	+	393	539;355;422;568	4	Bacteroides salyersiae strain BFG-256	AGTTCTGCAAAGACTTTGCAAA	AGTTCTGCAAAGACTTTGCAAA	AGTTCTGCAAAGACTTTGCAGA	AGTTCTGCAAAGACTTTGCAGA
GCF_025914135.1_ASM2591413v1	71.208	Bacteroides	salyersiae	MEKIIYNLVFNRKKSLNKKGMALVQIEAYLNRKKKYFSTKVYLKPEQWDAKRRRVRNHPNADAINRMIYEYMAEIEKKELGLWQQRKTVTLDALKEALVSVQEEEESFLAFFRKEIINSRLKESTKQNHLSTLELLREYKKDVSFTELTFEFISSFDQYLQAKGYHVNTIAKHMKHLKRHINTAINKEYMEIQKYAFRKYKIKSVENNHTHLSPDELNKIEKLDLGDRYTRLEKTKDAFLFCCYAGLRYSDFVNLSSENIVKIQKDTWLIYKTIKTRIEVRLPLYLLFKGKGLEILNKYQNNLSDFFNLRDNSNVNKELIIISRLAGIHKKISFHTARHTNATLLIYNGVNITTVQKLLGHKSVKTTQVYTNVMDMTIVRDLEKAKSTKRSPV	WP_007478783.1	GCF_025914135.1	NZ_CP083674.1	2825535	2826716	+	393	568;355;422;539	4	Bacteroides salyersiae strain WAL9166	AGTTCTGCAAAGACTTTGCAGA	AGTTCTGCAAAGACTTTGCAAA	AGTTCTGCAAAGACTTTGCAGA	AGTTCTGCAAAGACTTTGCAAA
GCF_025914155.1_ASM2591415v1	71.208	Bacteroides	salyersiae	MEKIIYNLVFNRKKSLNKKGMALVQIEAYLNRKKKYFSTKVYLKPEQWDAKRRRVRNHPNADAINRMIYEYMAEIEKKELGLWQQRKTVTLDALKEALVSVQEEEESFLAFFRKEIINSRLKESTKQNHLSTLELLREYKKDVSFTELTFEFISSFDQYLQAKGYHVNTIAKHMKHLKRHINTAINKEYMEIQKYAFRKYKIKSVENNHTHLSPDELNKIEKLDLGDRYTRLEKTKDAFLFCCYAGLRYSDFVNLSSENIVKIQKDTWLIYKTIKTRIEVRLPLYLLFKGKGLEILNKYQNNLSDFFNLRDNSNVNKELIIISRLAGIHKKISFHTARHTNATLLIYNGVNITTVQKLLGHKSVKTTQVYTNVMDMTIVRDLEKAKSTKRSPV	WP_007478783.1	GCF_025914155.1	NZ_CP083675.1	776346	777527	-	393	568;355;539	3	Bacteroides salyersiae strain WAL7960	AGTTCTGCAAAGACTTTGCAGA	AGTTCTGCAAAGACTTTGCAAA	AGTTCTGCAAAGACTTTGCAAA
GCF_031172035.1_ASM3117203v1	71.208	Bacteroides	salyersiae	MEKIIYNLVFNRKKSLNKKGMALVQIEAYLNRKKKYFSTKVYLKPEQWDAKRRRVRNHPNADAINRMIYEYMAEIEKKELGLWQQRKTVTLDALKEALVSVQEEEESFLAFFRKEIINSRLKESTKQNHLSTLELLREYKKDVSFTELTFEFISSFDQYLQAKGYHVNTIAKHMKHLKRHINTAINKEYMEIQKYAFRKYKIKSVENNHTHLSPDELNKIEKLDLGDRYTRLEKTKDAFLFCCYAGLRYSDFVNLSSENIVKIQKDTWLIYKTIKTRIEVRLPLYLLFKGKGLEILNKYQNNLSDFFNLRDNSNVNKELIIISRLAGIHKKISFHTARHTNATLLIYNGVNITTVQKLLGHKSVKTTQVYTNVMDMTIVRDLEKAKSTKRSPV	WP_007478783.1	GCF_031172035.1	NZ_CP133452.1	2054825	2056006	-	393	539;355;568	3	Bacteroides salyersiae strain CSP6	AGTTCTGCAAAGACTTTGCAAA	AGTTCTGCAAAGACTTTGCAAA	AGTTCTGCAAAGACTTTGCAGA
GCF_036416795.1_ASM3641679v1	68.844	Bacteroides	maternus	MNKIIYSLVYNRKKNLNKRGVALVQVEAYLNRKKKYFSTKVYLRPDQWDAKKLLVKNHPNADALNRLIYEFMAMIEKRELELWQQGKPITLEILKEVLSEQQEQEDKSSFIPFFKHEVMTSNLKESTKRNHLSTLALLQDFKKNVTFSDLTFEFVSSFEYFLQSKGYHTNTIAKHMKHLKRHINVAINKEYMDIQKYAFRKYKIKTVENGHTHLSPEELEKMETLQLTGRYMKYQKTLDAFLFCCYAGMRYSDFVNMKSENIIEMHQETWLIYKSIKTGTEVRLPLYLLFNGKGIRILNKYQADLQDFFHLRDNSNVNKELIIIARLAGLSKKVSFHTARHTNATLLIYNGVNITTVQKLLGHKSVKTTQIYTNVMDMTIISDLEKNHSLAHRKKGK	WP_291554997.1	GCF_036416795.1	NZ_CP143867.1	2713891	2715084	+	397	612;618;480;175;199	5	Bacteroides maternus strain MSB163	AGTTCTGCGAAGACTTTGCAGG	AGTTCTGCGAAAACGCTTCAGA	AGTTCTGCGAAAACGCTTCAGA	AGTTCTGCGAAAACATTGCAAA	AGTTCTGCGAAGACTTTGCGGG
GCF_020091485.1_ASM2009148v1	71.212	Bacteroides	stercoris	MNKIIYSLVYNRKKCLNKRGMALVQVEAYLDRKKKYFSTKVYLKPEQWDAKKLVVKNHPNADALNRLIYEFVAAIEKKELELWQQGKRISLELLKDALATRENNSSFISFFKQEVSNSSLKDSTKRNHLSTLLLLQEFKRDIVFSDLTFEFVSSFEYFLQQKGYHTNTIAKHMKHLKRHINIAINKEYIEIQKYAFRKYKIKTVENKHTHLVPEELEQLERLSLTDKHMKLQKSLDAFLFCCYAGMRYSDFTNLSKKNIVDINQETWLIYKSVKTGTEVRLPLYLLFAGKGIVILNKYRNNLEDFFRLRDNSNINKDLIIIAKLAGLSKKISFHTARHTNATLLIYNGVNITTVQKLLGHKSVKTTQVYTNIMDMTIVHDLEKIKQAALGIKKKTDNSF…	WP_005653000.1	GCF_020091485.1	NZ_CP081913.1	2044926	2046131	+	401	578;218;845;80	4	Bacteroides eggerthii strain DSM 20697	AGTTCTGCGAAAACTTTGCAGA	AGTTCTGCGAAAACTTTGCAGA	AGTTCTGCGAAAACTTTGCAGA	AGTTCTGCGAAAACTTTGCAGA
GCF_025147325.1_ASM2514732v1	71.212	Bacteroides	stercoris	MNKIIYSLVYNRKKCLNKRGMALVQVEAYLDRKKKYFSTKVYLKPEQWDAKKLVVKNHPNADALNRLIYEFVAAIEKKELELWQQGKRISLELLKDALATRENNSSFISFFKQEVSNSSLKDSTKRNHLSTLLLLQEFKRDIVFSDLTFEFVSSFEYFLQQKGYHTNTIAKHMKHLKRHINIAINKEYIEIQKYAFRKYKIKTVENKHTHLVPEELEQLERLSLTDKHMKLQKSLDAFLFCCYAGMRYSDFTNLSKKNIVDINQETWLIYKSVKTGTEVRLPLYLLFAGKGIVILNKYRNNLEDFFRLRDNSNINKDLIIIAKLAGLSKKISFHTARHTNATLLIYNGVNITTVQKLLGHKSVKTTQVYTNIMDMTIVHDLEKIKQAALGIKKKTDNSF…	WP_005653000.1	GCF_025147325.1	NZ_CP102262.1	239599	240804	+	401	578;218;615;80	4	Bacteroides stercoris ATCC 43183	AGTTCTGCGAAAACTTTGCAGA	AGTTCTGCGAAAACTTTGCAAA	AGTTCTGCGAAAACTTTGCAGA	AGTTCTGCGAAAACTTTGCAGA
GCF_000011065.1_ASM1106v1	100	Bacteroides	thetaiotaomicron	MKKISYSLVFNRKKKLNKKGMALVQVEAYLNRRKMYFSTRVYLKPDQWDVKRRMVKNHPNSDALNRMLYDFIADIEQKELGLWQQRRSISLDSLKDSIEKPENNGNSFLTFFKEEVSNSSLKESTRQNHLSTLELLQEYKKDIVFTDLTFEFVSSFDNYLQSKGYHLNTIAKHMKHLKRYVNVAINKEYMDIQKYAFRKYKIKSIEGSHTHLSPEELNKMEEVNLEGKFTKLQKSKDAFLFCCYAGLRYSDFINLTAANIVELHQETWLIYKSVKTGIDVRLPLYLLFEGKGLRVLETYKDDLNGFFKLKDNSNVNKDLNALAKLAEIDKRISFHTARHTNATLLIYSGANITTVQKLLGHKSVKTTQVYANIMDMTIVHDLEKAAYSKLANRPKS	WP_011108198.1	GCF_000011065.1	NC_004663.1	2845418	2846608	-	396	23;58;66	3	Bacteroides thetaiotaomicron VPI-5482	AGTTCTGCAAAGACTTTGCAGA	AGTTCTGCAAAGACTTTGCAAA	AGTTCTGCAAAGACTTTGCAGA
GCF_012151035.1_ASM1215103v1	99.495	Bacteroides	thetaiotaomicron	MKKISYSLVFNRKKKLNKKGMALVQVEAYLNRRKMYFSTRVYLKPDQWDVKRRMVKNHPNSDALNRMLYDFIADIEQKELGLWQQRRSISLDSLKDSIEKPENNGNSFLTFFKEEVSNSSLKESTRQNHLSTLELLQEYKKDIVFTDLTFEFVSSFDNYLQSKGYHLNTIAKHMKHLKRYVNVAINKEYMDIQKYAFRKYKIKSIEGSHTHLSPEELNKMEEVNLEGKFTKLQKSKDAFLFCCYAGLRYSDFINLTAANIVELHQETWLIYKSVKTGIDVRLPLYLLFEGKGLRVLENYKDDLNGFFKLKDNSNVNKDLNALARLAEIDKRISFHTARHTNATLLIYSGANITTVQKLLGHKSVKTTQVYANIMDMTIVHDLEKAAYSKLANRPKS	WP_022470399.1	GCF_012151035.1	NZ_AP022660.1	4576019	4577209	-	396	23;58;66	3	Bacteroides thetaiotaomicron strain F9-2	destroyed sequence	AGTTCTGCAAAGACTTTGCAAA	AGTTCTGCAAAGACTTTGCAGA
GCF_014131755.1_ASM1413175v1	100	Bacteroides	thetaiotaomicron	MKKISYSLVFNRKKKLNKKGMALVQVEAYLNRRKMYFSTRVYLKPDQWDVKRRMVKNHPNSDALNRMLYDFIADIEQKELGLWQQRRSISLDSLKDSIEKPENNGNSFLTFFKEEVSNSSLKESTRQNHLSTLELLQEYKKDIVFTDLTFEFVSSFDNYLQSKGYHLNTIAKHMKHLKRYVNVAINKEYMDIQKYAFRKYKIKSIEGSHTHLSPEELNKMEEVNLEGKFTKLQKSKDAFLFCCYAGLRYSDFINLTAANIVELHQETWLIYKSVKTGIDVRLPLYLLFEGKGLRVLETYKDDLNGFFKLKDNSNVNKDLNALAKLAEIDKRISFHTARHTNATLLIYSGANITTVQKLLGHKSVKTTQVYANIMDMTIVHDLEKAAYSKLANRPKS	WP_011108198.1	GCF_014131755.1	NZ_CP040530.1	148163	149353	-	396	23;58;66	3	Bacteroides thetaiotaomicron strain DSM 2079	AGTTCTGCAAAGACTTTGCAGA	AGTTCTGCAAAGACTTTGCAAA	AGTTCTGCAAAGACTTTGCAGA
GCF_016117715.1_ASM1611771v1	99.495	Bacteroides	thetaiotaomicron	MKKISYSLVFNRKKKLNKKGMALVQVEAYLNRRKMYFSTRVYLKPDQWDVKRRMVKNHPNSDALNRMLYDFIADIEQKELGLWQQRRSISLDSLKDSIEKPENNGNSFLTFFKEEVNNSSLKESTRQNHLSTLELLQEYKKDIVFTDLTFEFVSSFDNYLQSKGYHLNTIAKHMKHLKRYVNVAINKEYMDIQKYAFRKYKIKSIEGSHTHLSPEELNKMEEVNLEGKFTKLQKSKDAFLFCCYAGLRYSDFINLTAANIVELHQETWLIYKSVKTGIDVRLPLYLLFEGKGLRVLENYKDDLNGFFKLKDNSNVNKDLNALAKLAEIDKRISFHTARHTNATLLIYSGANITTVQKLLGHKSVKTTQVYANIMDMTIVHDLEKAAYSKLANRPKS	WP_113747841.1	GCF_016117715.1	NZ_CP065872.1	1570009	1571199	+	396	66;58;23	3	Bacteroides thetaiotaomicron strain FDAARGOS_935	AGTTCTGCAAAGACTTTGCAGA	AGTTCTGCAAAGACTTTGCAAA	AGTTCTGCAAAGACTTTGCAGA
GCF_018289275.1_ASM1828927v1	99.495	Bacteroides	thetaiotaomicron	MKKISYSLVFNRKKKLNKKGMALVQVEAYLNRRKMYFSTRVYLKPDQWDVKRRMVKNHPNSDALNRMLYDFIADIEQKELGLWQQRRSISLDSLKDSIEKPENNGNSFLTFFKEEVSNSSLKESTRQNHLSTLELLQEYKKDIVFTDLTFEFVSSFDNYLQSKGYHLNTIAKHMKHLKRYVNVAINKEYMDIQKYAFRKYKIKSIEGSHTHLSPEELNKMEEVNLEGKFTKFQKSKDAFLFCCYAGLRYSDFINLTAANIVELHQETWLIYKSVKTGIDVRLPLYLLFEGKGLRVLENYKDDLNGFFKLKDNSNVNKDLNALAKLAEIDKRISFHTARHTNATLLIYSGANITTVQKLLGHKSVKTTQVYANIMDMTIVHDLEKAAYSKLANRPKS	WP_008759574.1	GCF_018289275.1	NZ_CP072224.1	2972888	2974078	-	396	23;58;66	3	Bacteroides thetaiotaomicron strain CL11T00C24	AGTTCTGCAAAGACTTTGCAGA	AGTTCTGCAAAGACTTTGCAAA	AGTTCTGCAAAGACTTTGCAGA
GCF_018291825.1_ASM1829182v1	99.747	Bacteroides	thetaiotaomicron	MKKISYSLVFNRKKKLNKKGMALVQVEAYLNRRKMYFSTRVYLKPDQWDVKRRMVKNHPNSDALNRMLYDFIADIEQKELGLWQQRRSISLDSLKDSIEKPENNGNSFLTFFKEEVSNSSLKESTRQNHLSTLELLQEYKKDIVFTDLTFEFVSSFDNYLQSKGYHLNTIAKHMKHLKRYVNVAINKEYMDIQKYAFRKYKIKSIEGSHTHLSPEELNKMEEVNLEGKFTKLQKSKDAFLFCCYAGLRYSDFINLTAANIVELHQETWLIYKSVKTGIDVRLPLYLLFEGKGLRVLENYKDDLNGFFKLKDNSNVNKDLNALAKLAEIDKRISFHTARHTNATLLIYSGANITTVQKLLGHKSVKTTQVYANIMDMTIVHDLEKAAYSKLANRPKS	WP_048692301.1	GCF_018291825.1	NZ_CP072242.1	4396057	4397247	+	396	23;58;66	3	Bacteroides thetaiotaomicron strain CL06T03C18	AGTTCTGCAAAGACTTTGCAGA	AGTTCTGCAAAGACTTTGCAAA	AGTTCTGCAAAGACTTTGCAGA
GCF_019857385.1_ASM1985738v1	99.747	Bacteroides	thetaiotaomicron	MKKISYSLVFNRKKKLNKKGMALVQVEAYLNRRKMYFSTRVYLKPDQWDVKRRMVKNHPNSDALNRMLYDFIADIEQKELGLWQQRRSISLDSLKDSIEKPENNGNSFLTFFKEEVSNSSLKESTRQNHLSTLELLQEYKKDIVFTDLTFEFVSSFDNYLQSKGYHLNTIAKHMKHLKRYVNVAINKEYMDIQKYAFRKYKIKSIEGSHTHLSPEELNKMEEVNLEGKFTKLQKSKDAFLFCCYAGLRYSDFINLTAANIVELHQETWLIYKSVKTGIDVRLPLYLLFEGKGLRVLENYKDDLNGFFKLKDNSNVNKDLNALAKLAEIDKRISFHTARHTNATLLIYSGANITTVQKLLGHKSVKTTQVYANIMDMTIVHDLEKAAYSKLANRPKS	WP_048692301.1	GCF_019857385.1	NZ_CP075195.1	1737958	1739148	+	396	23;58;66	3	Bacteroides thetaiotaomicron strain CL15T119C52	AGTTCTGCAAAGACTTTGCAGA	AGTTCTGCAAAGACTTTGCAAA	AGTTCTGCAAAGACTTTGCAGA
GCF_019896115.1_ASM1989611v1	99.747	Bacteroides	thetaiotaomicron	MKKISYSLVFNRKKKLNKKGMALVQVEAYLNRRKMYFSTRVYLKPDQWDVKRRMVKNHPNSDALNRMLYDFIADIEQKELGLWQQRRSISLDSLKDSIEKPENNGNSFLTFFKEEVSNSSLKESTRQNHLSTLELLQEYKKDIVFTDLTFEFVSSFDNYLQSKGYHLNTIAKHMKHLKRYVNVAINKEYMDIQKYAFRKYKIKSIEGSHTHLSPEELNKMEEVNLEGKFTKLQKSKDAFLFCCYAGLRYSDFINLTAANIVELHQETWLIYKSVKTGIDVRLPLYLLFEGKGLRVLENYKDDLNGFFKLKDNSNVNKDLNALAKLAEIDKRISFHTARHTNATLLIYSGANITTVQKLLGHKSVKTTQVYANIMDMTIVHDLEKAAYSKLANRPKS	WP_048692301.1	GCF_019896115.1	NZ_CP075193.1	1718168	1719358	+	396	23;58;66	3	Bacteroides thetaiotaomicron strain CL15T12C11	AGTTCTGCAAAGACTTTGCAGA	AGTTCTGCAAAGACTTTGCAAA	AGTTCTGCAAAGACTTTGCAGA
GCF_020091305.1_ASM2009130v1	99.747	Bacteroides	thetaiotaomicron	MKKISYSLVFNRKKKLNKKGMALVQVEAYLNRRKMYFSTRVYLKPDQWDVKRRMVKNHPNSDALNRMLYDFIADIEQKELGLWQQRRSISLDSLKDSIEKPENNGNSFLTFFKEEVSNSSLKESTRQNHLSTLELLQEYKKDIVFTDLTFEFVSSFDNYLQSKGYHLNTIAKHMKHLKRYVNVAINKEYMDIQKYAFRKYKIKSIEGSHTHLSPEELNKMEEVNLEGKFTKLQKSKDAFLFCCYAGLRYSDFINLTAANIVELHQETWLIYKSVKTGIDVRLPLYLLFEGKGLRVLENYKDDLNGFFKLKDNSNVNKDLNALAKLAEIDKRISFHTARHTNATLLIYSGANITTVQKLLGHKSVKTTQVYANIMDMTIVHDLEKAAYSKLANRPKS	WP_048692301.1	GCF_020091305.1	NZ_CP081898.1	146871	148061	-	396	23;58;66	3	Bacteroides thetaiotaomicron strain BFG-55	AGTTCTGCAAAGACTTTGCAGA	AGTTCTGCAAAGACTTTGCAAA	AGTTCTGCAAAGACTTTGCAGA
GCF_022453665.1_ASM2245366v1	100	Bacteroides	thetaiotaomicron	MKKISYSLVFNRKKKLNKKGMALVQVEAYLNRRKMYFSTRVYLKPDQWDVKRRMVKNHPNSDALNRMLYDFIADIEQKELGLWQQRRSISLDSLKDSIEKPENNGNSFLTFFKEEVSNSSLKESTRQNHLSTLELLQEYKKDIVFTDLTFEFVSSFDNYLQSKGYHLNTIAKHMKHLKRYVNVAINKEYMDIQKYAFRKYKIKSIEGSHTHLSPEELNKMEEVNLEGKFTKLQKSKDAFLFCCYAGLRYSDFINLTAANIVELHQETWLIYKSVKTGIDVRLPLYLLFEGKGLRVLETYKDDLNGFFKLKDNSNVNKDLNALAKLAEIDKRISFHTARHTNATLLIYSGANITTVQKLLGHKSVKTTQVYANIMDMTIVHDLEKAAYSKLANRPKS	WP_011108198.1	GCF_022453665.1	NZ_CP092641.1	141592	142782	+	396	23;58;66	3	Bacteroides thetaiotaomicron strain VPI 5482	AGTTCTGCAAAGACTTTGCAGA	AGTTCTGCAAAGACTTTGCAAA	AGTTCTGCAAAGACTTTGCAGA
GCF_024759205.1_ASM2475920v1	99.747	Bacteroides	thetaiotaomicron	MKKISYSLVFNRKKKLNKKGMALVQVEAYLNRRKMYFSTRVYLKPDQWDVKRRMVKNHPNSDALNRMLYDFIADIEQKELGLWQQRRSISLDSLKDSIEKPENNGNSFLTFFKEEVSNSSLKESTRQNHLSTLELLQEYKKDIVFTDLTFEFVSSFDNYLQSKGYHLNTIAKHMKHLKRYVNVAINKEYMDIQKYAFRKYKIKSIEGSHTHLSPEELNKMEEVNLEGKFTKLQKSKDAFLFCCYAGLRYSDFINLTAANIVELHQETWLIYKSVKTGIDVRLPLYLLFEGKGLRVLENYKDDLNGFFKLKDNSNVNKDLNALAKLAEIDKRISFHTARHTNATLLIYSGANITTVQKLLGHKSVKTTQVYANIMDMTIVHDLEKAAYSKLANRPKS	WP_048692301.1	GCF_024759205.1	NZ_CP103118.1	143209	144399	+	396	23;58;66	3	Bacteroides thetaiotaomicron strain BFG-510	AGTTCTGCAAAGACTTTGCAGA	AGTTCTGCAAAGACTTTGCAAA	AGTTCTGCAAAGACTTTGCAGA
GCF_024760065.1_ASM2476006v1	100	Bacteroides	thetaiotaomicron	MKKISYSLVFNRKKKLNKKGMALVQVEAYLNRRKMYFSTRVYLKPDQWDVKRRMVKNHPNSDALNRMLYDFIADIEQKELGLWQQRRSISLDSLKDSIEKPENNGNSFLTFFKEEVSNSSLKESTRQNHLSTLELLQEYKKDIVFTDLTFEFVSSFDNYLQSKGYHLNTIAKHMKHLKRYVNVAINKEYMDIQKYAFRKYKIKSIEGSHTHLSPEELNKMEEVNLEGKFTKLQKSKDAFLFCCYAGLRYSDFINLTAANIVELHQETWLIYKSVKTGIDVRLPLYLLFEGKGLRVLETYKDDLNGFFKLKDNSNVNKDLNALAKLAEIDKRISFHTARHTNATLLIYSGANITTVQKLLGHKSVKTTQVYANIMDMTIVHDLEKAAYSKLANRPKS	WP_011108198.1	GCF_024760065.1	NZ_CP103247.1	151578	152768	-	396	23;58;66	3	Bacteroides thetaiotaomicron strain BFG-264	AGTTCTGCAAAGACTTTGCAGA	AGTTCTGCAAAGACTTTGCAAA	AGTTCTGCAAAGACTTTGCAGA
GCF_024760245.1_ASM2476024v1	99.747	Bacteroides	thetaiotaomicron	MKKISYSLVFNRKKKLNKKGMALVQVEAYLNRRKMYFSTRVYLKPDQWDVKRRMVKNHPNSDALNRMLYDFIADIEQKELGLWQQRRSISLDSLKDSIEKPENNGNSFLTFFKEEVSNSSLKESTRQNHLSTLELLQEYKKDIVFTDLTFEFVSSFDNYLQSKGYHLNTIAKHMKHLKRYVNVAINKEYMDIQKYAFRKYKIKSIEGSHTHLSPEELNKMEEVNLEGKFTKLQKSKDAFLFCCYAGLRYSDFINLTAANIVELHQETWLIYKSVKTGIDVRLPLYLLFEGKGLRVLENYKDDLNGFFKLKDNSNVNKDLNALAKLAEIDKRISFHTARHTNATLLIYSGANITTVQKLLGHKSVKTTQVYANIMDMTIVHDLEKAAYSKLANRPKS	WP_048692301.1	GCF_024760245.1	NZ_CP103283.1	147710	148900	-	396	23;58;66	3	Bacteroides thetaiotaomicron strain BFG-119	AGTTCTGCAAAGACTTTGCAGA	AGTTCTGCAAAGACTTTGCAAA	AGTTCTGCAAAGACTTTGCAGA
GCF_024799845.1_ASM2479984v1	99.242	Bacteroides	thetaiotaomicron	MKKISYSLVFNRKKKLNKKGMALVQVEAYLNRRKMYFSTRVYLKPDQWDVKRRMVKNHPNSDALNRMLYDFIADIEQKELGLWQQRRSISLDSLKDSIEKPENNGNSFLTFFKEEVNNSSLKESTRQNHLSTLELLQEYKKDIVFTDLTFEFVSSFDNYLQSKGYHLNTIAKHMKHLKRYVNVAINKEYMDIQKYAFRKYKIKSIEGSHTHLSPEELNKMEEVNLEGKFTKLQKSKDAFLFCCYAGLRYSDFINLTAANIVELHQETWLIYKSVKTGIDVRLPLYLLFEGKGLRVLENYKDDLNGFFKLKDNSNVNKDLNALAKLAEIDKRISFHTARHTNATLLIYSGANITTVQKLLGHKSVKTTQVYANIMDMTIVHDLEKAAYSKLANRPKG	WP_195380831.1	GCF_024799845.1	NZ_CP103375.1	157851	159041	-	396	23;58;66	3	Bacteroides thetaiotaomicron strain BFG-116	AGTTCTGCAAAGACTTTGCAGA	AGTTCTGCAAAGACTTTGCAAA	AGTTCTGCAAAGACTTTGCAAA
GCF_024799865.1_ASM2479986v1	97.985	Bacteroides	thetaiotaomicron	MKKISYSLVFNRKKKLNKKGMALVQVEAYLNRRKMYFSTRVYLKPDQWDVKRRMVKNHPNSDALNRMLYDFIADIEQKELGLWQQRRSISLDSLKDSIEKPENNGNSFWPDLFKEEVNNSSLKESTRQNHLSTLELLQEYKKDIVFTDLTFEFVSSFDNYLQSKGYHLNTIAKHMKHLKRYVNVAINKEYMDIQKYAFRKYKIKSIEGSHTHLSPEELNKMEEVNLEGKFTKLQKSKDAFLFCCYAGLRYSDFINLTAANIVELHQETWLIYKSVKTGIDVRLPLYLLFEGKGLRVLENYKDDLNGFFRLKDNSNVNKDLNALAKLAEIDKRISFHTARHTNATLLIYSGANITTVQKLLGHKSVKTTQVYANIMDMTIVHDLEKAAYSKLANRPKG	WP_310506345.1	GCF_024799865.1	NZ_CP103377.1	140285	141478	-	397	23;58;66	3	Bacteroides thetaiotaomicron strain BFG-266	AGTTCTGCAAAGACTTTGCAGA	AGTTCTGCAAAGACTTTGCAAA	AGTTCTGCAAAGACTTTGCAGA
GCF_025914215.1_ASM2591421v1	98.99	Bacteroides	thetaiotaomicron	MKKISYSLVFNRKKKLNKKGMALVQVEAYLNRRKMYFSTRVYLKPDQWDVKRRMVKNHPNSDALNRMLYDFIADIEQKELGLWQQRRSISLDSLKDSIEKPENNGNSFLTFFKEEVNNSSLKESTRQNHLSTLELLQEYKKDIVFTDLTFEFVSSFDNYLQSKGYHLNTIAKHMKHLKRYVNVAINKEYMDIQKYAFRKYKIKSIEGSHTHLSPEELNKMEEVNLEGKFTKLQKSKDAFLFCCYAGLRYSDFINLTAANIVELHQETWLIYKSVKTGIDVRLPLYLLFEGKGLRVLENYKDDLNGFFRLKDNSNVNKDLNALAKLAEIDKRISFHTARHTNATLLIYSGANITTVQKLLGHKSVKTTQVYANIMDMTIVHDLEKAAYSKLANRPKG	WP_008764024.1	GCF_025914215.1	NZ_CP083679.1	2022392	2023582	-	396	66;23	2	Bacteroides thetaiotaomicron strain WAL8713	AGTTCTGCAAAGACTTTGCAGA	AGTTCTGCAAAGACTTTGCAGA
GCF_025914255.1_ASM2591425v1	99.747	Bacteroides	thetaiotaomicron	MKKISYSLVFNRKKKLNKKGMALVQVEAYLNRRKMYFSTRVYLKPDQWDVKRRMVKNHPNSDALNRMLYDFIADIEQKELGLWQQRRSISLDSLKDSIEKPENNGNSFLTFFKEEVSNSSLKESTRQNHLSTLELLQEYKKDIVFTDLTFEFVSSFDNYLQSKGYHLNTIAKHMKHLKRYVNVAINKEYMDIQKYAFRKYKIKSIEGSHTHLSPEELNKMEEVNLEGKFTKLQKSKDAFLFCCYAGLRYSDFINLTAANIVELHQETWLIYKSVKTGIDVRLPLYLLFEGKGLRVLENYKDDLNGFFKLKDNSNVNKDLNALAKLAEIDKRISFHTARHTNATLLIYSGANITTVQKLLGHKSVKTTQVYANIMDMTIVHDLEKAAYSKLANRPKS	WP_048692301.1	GCF_025914255.1	NZ_CP083681.1	6436197	6437387	-	396	23;58;66	3	Bacteroides thetaiotaomicron strain VPI-BTDOT2	AGTTCTGCAAAGACTTTGCAGA	AGTTCTGCAAAGACTTTGCAAA	AGTTCTGCAAAGACTTTGCAGA
GCF_025914275.1_ASM2591427v1	99.747	Bacteroides	thetaiotaomicron	MKKISYSLVFNRKKKLNKKGMALVQVEAYLNRRKMYFSTRVYLKPDQWDVKRRMVKNHPNSDALNRMLYDFIADIEQKELGLWQQRRSISLDSLKDSIEKPENNGNSFLTFFKEEVSNSSLKESTRQNHLSTLELLQEYKKDIVFTDLTFEFVSSFDNYLQSKGYHLNTIAKHMKHLKRYVNVAINKEYMDIQKYAFRKYKIKSIEGSHTHLSPEELNKMEEVNLEGKFTKLQKSKDAFLFCCYAGLRYSDFINLTAANIVELHQETWLIYKSVKTGIDVRLPLYLLFEGKGLRVLENYKDDLNGFFKLKDNSNVNKDLNALAKLAEIDKRISFHTARHTNATLLIYSGANITTVQKLLGHKSVKTTQVYANIMDMTIVHDLEKAAYSKLANRPKS	WP_048692301.1	GCF_025914275.1	NZ_CP083682.1	1002546	1003736	+	396	23;58;66	3	Bacteroides thetaiotaomicron strain VPI-BT8702	AGTTCTGCAAAGACTTTGCAGA	AGTTCTGCAAAGACTTTGCAAA	AGTTCTGCAAAGACTTTGCAGA
GCF_025916255.1_ASM2591625v1	98.99	Bacteroides	thetaiotaomicron	MKKISYSLVFNRKKKLNKKGMALVQVEAYLNRRKMYFSTRVYLKPDQWDVKRRMVKNHPNSDALNRMLYDFIADIEQKELGLWQQRRSISLDSLKDSIEKPENNGNSFLTFFKEEVNNSSLKESTRQNHLSTLELLQEYKKDIVFTDLTFEFVSSFDNYLQSKGYHLNTIAKHMKHLKRYVNVAINKEYMDIQKYAFRKYKIKSIEGSHTHLSPEELNKMEEVNLEGKFTKLQKSKDAFLFCCYAGLRYSDFINLTAANIVELHQETWLIYKSVKTGIDVRLPLYLLFEGKGLRVLENYKDDLNGFFRLKDNSNVNKDLNALAKLAEIDKRISFHTARHTNATLLIYSGANITTVQKLLGHKSVKTTQVYANIMDMTIVHDLEKAAYSKLANRPKG	WP_008764024.1	GCF_025916255.1	NZ_CP083683.1	453884	455074	-	396	23;60	2	Bacteroides thetaiotaomicron strain VPI-BT7853	AGTTCTGCAAAGACTTTGCAGA	AGTTCTGCAAAGACTTTGCAGA
GCF_025916295.1_ASM2591629v1	99.495	Bacteroides	thetaiotaomicron	MKKISYSLVFNRKKKLNKKGMALVQVEAYLNRRKMYFSTRVYLKPDQWDVKRRMVKNHPNSDALNRMLYDFIADIEQKELGLWQQRRSISLDSLKDSIEKPENNGNSFLTFFKEEVSNSSLKESTRQNHLSTLELLQEYKKDIVFTDLTFEFVSSFDNYLQSKGYHLNTIAKHMKHLKRYVNVAINKEYMDIQKYAFRKYKIKSIEGSHTHLSPEELNKMEEVNLEGKFTKFQKSKDAFLFCCYAGLRYSDFINLTAANIVELHQETWLIYKSVKTGIDVRLPLYLLFEGKGLRVLENYKDDLNGFFKLKDNSNVNKDLNALAKLAEIDKRISFHTARHTNATLLIYSGANITTVQKLLGHKSVKTTQVYANIMDMTIVHDLEKAAYSKLANRPKS	WP_008759574.1	GCF_025916295.1	NZ_CP083685.1	1904834	1906024	+	396	66;58;23	3	Bacteroides thetaiotaomicron strain VPI-3443	AGTTCTGCAAAGACTTTGCAGA	AGTTCTGCAAAGACTTTGCAAA	AGTTCTGCAAAGACTTTGCAGA
GCF_025916315.1_ASM2591631v1	99.747	Bacteroides	thetaiotaomicron	MKKISYSLVFNRKKKLNKKGMALVQVEAYLNRRKMYFSTRVYLKPDQWDVKRRMVKNHPNSDALNRMLYDFIADIEQKELGLWQQRRSISLDSLKDSIEKPENNGNSFLTFFKEEVSNSSLKESTRQNHLSTLELLQEYKKDIVFTDLTFEFVSSFDNYLQSKGYHLNTIAKHMKHLKRYVNVAINKEYMDIQKYAFRKYKIKSIEGSHTHLSPEELNKMEEVNLEGKFTKLQKSKDAFLFCCYAGLRYSDFINLTAANIVELHQETWLIYKSVKTGIDVRLPLYLLFEGKGLRVLENYKDDLNGFFKLKDNSNVNKDLNALAKLAEIDKRISFHTARHTNATLLIYSGANITTVQKLLGHKSVKTTQVYANIMDMTIVHDLEKAAYSKLANRPKS	WP_048692301.1	GCF_025916315.1	NZ_CP083686.1	574323	575513	-	396	23;58;66	3	Bacteroides thetaiotaomicron strain VPI-3164	AGTTCTGCAAAGACTTTGCAGA	AGTTCTGCAAAGACTTTGCAAA	AGTTCTGCAAAGACTTTGCAGA
GCF_025916335.1_ASM2591633v1	98.99	Bacteroides	thetaiotaomicron	MKKISYSLVFNRKKKLNKKGMALVQVEAYLNRRKMYFSTRVYLKPDQWDVKRRMVKNHPNSDALNRMLYDFIADIEQKELGLWQQRRSISLDSLKDSIEKPENNGNSFLTFFKEEVNNSSLKESTRQNHLSTLELLQEYKKDIVFTDLTFEFVSSFDNYLQSKGYHLNTIAKHMKHLKRYVNVAINKEYMDIQKYAFRKYKIKSIEGSHTHLSPEELNKMEEVNLEGKFTKLQKSKDAFLFCCYAGLRYSDFINLTAANIVELHQETWLIYKSVKTGIDVRLPLYLLFEGKGLRVLENYKDDLNGFFRLKDNSNVNKDLNALAKLAEIDKRISFHTARHTNATLLIYSGANITTVQKLLGHKSVKTTQVYANIMDMTIVHDLEKAAYSKLANRPKG	WP_008764024.1	GCF_025916335.1	NZ_CP083687.1	2791551	2792741	+	396	23;66	2	Bacteroides thetaiotaomicron strain VPI-2808B	AGTTCTGCAAAGACTTTGCAGA	AGTTCTGCAAAGACTTTGCAGA
GCF_032452895.1_ASM3245289v1	99.747	Bacteroides	thetaiotaomicron	MKKISYSLVFNRKKKLNKKGMALVQVEAYLNRRKMYFSTRVYLKPDQWDVKRRMVKNHPNSDALNRMLYDFIADIEQKELGLWQQRRSISLDSLKDSIEKPENNGNSFLTFFKEEVSNSSLKESTRQNHLSTLELLQEYKKDIVFTDLTFEFVSSFDNYLQSKGYHLNTIAKHMKHLKRYVNVAINKEYMDIQKYAFRKYKIKSIEGSHTHLSPEELNKMEEVNLEGKFTKLQKSKDAFLFCCYAGLRYSDFINLTAANIVELHQETWLIYKSVKTGIDVRLPLYLLFEGKGLRVLENYKDDLNGFFKLKDNSNVNKDLNALAKLAEIDKRISFHTARHTNATLLIYSGANITTVQKLLGHKSVKTTQVYANIMDMTIVHDLEKAAYSKLANRPKS	WP_048692301.1	GCF_032452895.1	NZ_CP134820.1	1046098	1047288	-	396	23;1100;66	3	Bacteroides thetaiotaomicron strain H-2622	AGTTCTGCAAAGACTTTGCAGA	AGTTCTGCAAAGACTTTGCAAA	AGTTCTGCAAAGACTTTGCAGA
GCF_032452915.1_ASM3245291v1	99.495	Bacteroides	thetaiotaomicron	MKKISYSLVFNRKKKLNKKGMALVQVEAYLNRRKMYFSTRVYLKPDQWDVKRRMVKNHPNSDALNRMLYDFIADIEQKELGLWQQRRSISLDSLKDSIEKPENNGNSFLTFFKEEVSNSSLKESTRQNHLSTLELLQEYKKDIVFTDLTFEFVSSFDNYLQSKGYHLNTIAKHMKHLKRYVNVAINKEYMDIQKYAFRKYKIKSIEGSHTHLSPEELNKMEEVNLEGKFTKFQKSKDAFLFCCYAGLRYSDFINLTAANIVELHQETWLIYKSVKTGIDVRLPLYLLFEGKGLRVLENYKDDLNGFFKLKDNSNVNKDLNALAKLAEIDKRISFHTARHTNATLLIYSGANITTVQKLLGHKSVKTTQVYANIMDMTIVHDLEKAAYSKLANRPKS	WP_008759574.1	GCF_032452915.1	NZ_CP134821.1	2729624	2730814	-	396	517;58;66	3	Bacteroides thetaiotaomicron strain H-2209	AGTTCTGCAAAGACTTTGCAGA	AGTTCTGCAAAGACTTTGCAAA	AGTTCTGCAAAGACTTTGCAGA
GCF_041014885.1_Genome_assembly_GPTB0036	99.747	Bacteroides	thetaiotaomicron	MKKISYSLVFNRKKKLNKKGMALVQVEAYLNRRKMYFSTRVYLKPDQWDVKRRMVKNHPNSDALNRMLYDFIADIEQKELGLWQQRRSISLDSLKDSIEKPENNGNSFLTFFKEEVSNSSLKESTRQNHLSTLELLQEYKKDIVFTDLTFEFVSSFDNYLQSKGYHLNTIAKHMKHLKRYVNVAINKEYMDIQKYAFRKYKIKSIEGSHTHLSPEELNKMEEVNLEGKFTKLQKSKDAFLFCCYAGLRYSDFINLTAANIVELHQETWLIYKSVKTGIDVRLPLYLLFEGKGLRVLENYKDDLNGFFKLKDNSNVNKDLNALAKLAEIDKRISFHTARHTNATLLIYSGANITTVQKLLGHKSVKTTQVYANIMDMTIVHDLEKAAYSKLANRPKS	WP_048692301.1	GCF_041014885.1	NZ_CP155529.1	146126	147316	+	396	23;58;66	3	Bacteroides thetaiotaomicron strain 5-290	AGTTCTGCAAAGACTTTGCAGA	AGTTCTGCAAAGACTTTGCAAA	AGTTCTGCAAAGACTTTGCAGA
GCF_006742345.1_ASM674234v1	72.396	Bacteroides	uniformis	MSKIIYNLVYNRKRSLNKKGMALVQVEAYLDRKKKYFSTKVYLKPEQWDNKKLIVKNHPNADALNRLIYEFMAMIEKKELELWQQGRRISLELLKDVLSTSENKTSFIPFFRQEIANSTLKESTKRNHLSTLSLLQQFKKDVTFSDLTFEFISSFEYFLQSRGYHTNTIAKHMKHLKRHINVAINKDYMEIQKYAFRKYKIKTIENKHTHLSPEELEKLEKLSLAGRYTKLQKTLDAFLFCCYAGMRYSDFISLSPDNIVEIRQETWLIYKSIKTSTEVRLPLYLLFEGKGLVILDKYRDDLQSFFHLRDNSNVNKDLIVISRLAGLSKKISFHTARHTNATLLIYNGVNITTVQKLLGHKSVKTTQVYTNVMDMTIVHDLEKNHALMPLPKKTRT	WP_005824324.1	GCF_006742345.1	NZ_AP019724.1	1911869	1913059	-	396	257;290;218;199	4	Bacteroides uniformis strain NBRC 113350	AGTTCCGCGAAAACTCTGGTGA	AGTTCCGCGAAAACTCTGGTGA	AGTTCCGCGAAAACTCTGGTGA	AGTTCCGCGAAAACTTTGGTGA
GCF_016117815.1_ASM1611781v1	72.396	Bacteroides	uniformis	MSKIIYNLVYNRKRSLNKKGMALVQVEAYLDRKKKYFSTKVYLKPEQWDNKKLIVKNHPNADALNRLIYEFMAMIEKKELELWQQGRRISLELLKDVLSTSENKTSFIPFFRQEIANSTLKESTKRNHLSTLSLLQQFKKDVTFSDLTFEFISSFEYFLQSRGYHTNTIAKHMKHLKRHINVAINKDYMEIQKYAFRKYKIKTIENKHTHLSPEELEKLEKLSLAGRYTKLQKTLDAFLFCCYAGMRYSDFISLSPDNIVEIRQETWLIYKSIKTSTEVRLPLYLLFEGKGLVILDKYRDDLQSFFHLRDNSNVNKDLIVISRLAGLSKKISFHTARHTNATLLIYNGVNITTVQKLLGHKSVKTTQVYTNVMDMTIVHDLEKNHALMPLPKKTRT	WP_005824324.1	GCF_016117815.1	NZ_CP065889.1	4015668	4016858	+	396	199;326;321;218;290;257	6	Bacteroides uniformis strain FDAARGOS_901	AGTTCCGCGAAAACTCTGGTAA	AGTTCCGCGAAAACTCTGCTAA	AGTTCCGCGAAAACTCTGGTAA	AGTTCCGCGAAAACTCTGGTGA	AGTTCCGCGAAAACTTTGGTAA	AGTTCCGCGAAAACTCTGGTGA
GCF_018289175.1_ASM1828917v1	72.396	Bacteroides	uniformis	MSKIIYNLVYNRKRSLNKKGMALVQVEAYLDRKKKYFSTKVYLKPEQWDNKKLIVKNHPNADALNRLIYEFMAMIEKKELELWQQGRRISLELLKDVLSTSENKTSFIPFFRQEIANSTLKESTKRNHLSTLSLLQQFKKDVTFSDLTFEFISSFEYFLQSRGYHTNTIAKHMKHLKRHINVAINKDYMEIQKYAFRKYKIKTIENKHTHLSPEELEKLEKLSLAGRYTKLQKTLDAFLFCCYAGMRYSDFISLSPDNIVEIRQETWLIYKSIKTSTEVRLPLYLLFEGKGLVILDKYRDDLQSFFHLRDNSNVNKDLIVISRLAGLSKKISFHTARHTNATLLIYNGVNITTVQKLLGHKSVKTTQVYTNVMDMTIVHDLEKNHALMPLPKKTRT	WP_005824324.1	GCF_018289175.1	NZ_CP072220.1	1970103	1971293	-	396	257;326;218;290;199	5	Bacteroides uniformis strain CL11T00C07	AGTTCCGCGAAAACTCTGGTGA	AGTTCCGCGAAAACTCTGCTAA	AGTTCCGCGAAAACTCTGGTGA	AGTTCCGCGAAAACTTTGGTAA	AGTTCCGCGAAAACTCTGGTGA
GCF_018291785.1_ASM1829178v1	72.135	Bacteroides	uniformis	MSKIIYNLVYNRKRSLNKKGMALVQVEAYLDRKKKYFSTKVYLKPEQWDNKKLIMKNHPNADALNRLIYEFMAMIEKKELELWQQGRRISLELLKDVLSTSENKTSFIPFFRQEIANSTLKESTKRNHLSTLSLLQQFKKDVTFSDLTFEFISSFEYFLQSRGYHTNTIAKHMKHLKRHINVAINKDYMEIQKYAFRKYKIKTIENKHTHLSPEELEKLEKLSLAGRYTKLQKTLDAFLFCCYAGMRYSDFISLSPDNIVEIRQETWLIYKSIKTSTEVRLPLYLLFEGKGLVILDKYRDDLQSFFHLRDNSNVNKDLIVISRLAGLSKKISFHTARHTNATLLIYNGVNITTVQKLLGHKSVKTTQVYTNVMDMTIVHDLEKNHALMPLPKKTRT	WP_211475614.1	GCF_018291785.1	NZ_CP072239.1	2161714	2162904	-	396	257;1027;218;290;199	5	Bacteroides uniformis strain CL06T03C05	AGTTCCGCGAAAACTCTGGTGA	AGTTCCGCGAAAACTCTGGTGA	AGTTCCGCGAAAACTCTGGTGA	AGTTCCGCGAAAACTCTGGTGA	AGTTCCGCGAAAACTCTGGTGA
GCF_018292165.1_ASM1829216v1	72.396	Bacteroides	uniformis	MSKIIYNLVYNRKRSLNKKGMALVQVEAYLDRKKKYFSTKVYLKPEQWDNKKLIVKNHPNADALNRLIYEFMAMIEKKELELWQQGRRISLELLKDVLSTSENKTSFIPFFRQEIANSALKESTKRNHLSTLSLLQQFKKDVTFSDLTFEFISSFEYFLQSRGYHTNTIAKHMKHLKRHINVAINKDYMEIQKYAFRKYKIKTIENKHTHLSPEELEKLEKLSLAGRYTKLQKTLDAFLFCCYAGMRYSDFISLSPDNIVEIRQETWLIYKSIKTSTEVRLPLYLLFEGKGLVILDKYRDDLQSFFHLRDNSNVNKDLIVISRLAGLSKKISFHTARHTNATLLIYNGVNITTVQKLLGHKSVKTTQVYTNVMDMTIVHDLEKNHALMPLPKKTRT	WP_005835062.1	GCF_018292165.1	NZ_CP072255.1	4872870	4874060	-	396	257;18;480;326;199	5	Bacteroides uniformis CL03T12C37	AGTTCCGCGAAAACTCTGGTGA	AGTTCCGCGAAAACTCTGGTGA	AGTTCCGCGAAAACTCTGGTAA	AGTTCCGCGAAAACTCTGGTGA	AGTTCCGCGAAAACTCTGGTGA
GCF_025147485.1_ASM2514748v1	72.396	Bacteroides	uniformis	MSKIIYNLVYNRKRSLNKKGMALVQVEAYLDRKKKYFSTKVYLKPEQWDNKKLIVKNHPNADALNRLIYEFMAMIEKKELELWQQGRRISLELLKDVLSTSENKTSFIPFFRQEIANSTLKESTKRNHLSTLSLLQQFKKDVTFSDLTFEFISSFEYFLQSRGYHTNTIAKHMKHLKRHINVAINKDYMEIQKYAFRKYKIKTIENKHTHLSPEELEKLEKLSLAGRYTKLQKTLDAFLFCCYAGMRYSDFISLSPDNIVEIRQETWLIYKSIKTSTEVRLPLYLLFEGKGLVILDKYRDDLQSFFHLRDNSNVNKDLIVISRLAGLSKKISFHTARHTNATLLIYNGVNITTVQKLLGHKSVKTTQVYTNVMDMTIVHDLEKNHALMPLPKKTRT	WP_005824324.1	GCF_025147485.1	NZ_CP102263.1	1861775	1862965	+	396	257;218;326;290;321;199	6	Bacteroides uniformis strain ATCC 8492	AGTTCCGCGAAAACTCTGGTGA	AGTTCCGCGAAAACTCTGGTGA	AGTTCCGCGAAAACTCTGCTAA	AGTTCCGCGAAAACTTTGGTAA	AGTTCCGCGAAAACTCTGGTAA	AGTTCCGCGAAAACTCTGGTAA
GCF_025914195.1_ASM2591419v1	72.396	Bacteroides	uniformis	MSKIIYNLVYNRKRSLNKKGMALVQVEAYLDRKKKYFSTKVYLKPEQWDNKKLIVKNHPNADALNRLIYEFMAMIEKKELELWQQGRRISLELLKDVLSTSENKTSFIPFFRQEIANSTLKESTKRNHLSTLSLLQQFKKDVTFSDLTFEFISSFEYFLQSRGYHTNTIAKHMKHLKRHINVAINKDYMEIQKYAFRKYKIKTIENKHTHLSPEELEKLEKLNLAGRYTKLQKTLDAFLFCCYAGMRYSDFISLSPDNIVKIRQETWLIYKSIKTSTEVRLPLYLLFEGKGLVILDKYRDDLQSFFHLRDNSNVNKDLIVISRLAGLSKKISFHTARHTNATLLIYNGVNITTVQKLLGHKSVKTTQVYTNVMDMTIVHDLEKNHALMPLPKKTRT	WP_061412937.1	GCF_025914195.1	NZ_CP083677.1	1311305	1312495	+	396	199;480;326;290;257	5	Bacteroides uniformis strain VPI-3537	AGTTCCGCGAAAACTCTGGTGA	AGTTCCGCGAAAACTTTGGTGA	AGTTCCGCGAAAACTCTGCTAA	AGTTCCGCGAAAACTTTGGTGA	AGTTCCGCGAAAACTCTGGTGA
GCF_006546965.1_ASM654696v1	82.262	Bacteroides	xylanisolvens	MEKISYNLVFNRKKRLNKRGMALVQVEAYLNRKKMYFSTKIYLKPEQWDAKRKMVKNHPNANVLNRMLYENIAAIEQTELGLWQQGKSISLDLLKNSIDKPLSNGRSFLTFFKEEIANSSLKESTRQNHLSTLELLQEFKKEVLFTDLTFEFVSSFDNYLQSKGYHLNTIAKHMKHLKRYINVAINKEYMDIQKYAFRKYKIKSIEGSHTHLAPEELHKFENLQLTGRYTRLQKTKDAFLFCCYAGLRYSDFTNLTSANIVEFHQETWIIYKSVKTGMEVRLPLYLLFEGKGIQILQRYKDDLNSFFKLKDNSNINKELNILAGLAKIDKRVSFHVARHTNATLLLYNGANITTVQKLLGHKSVKTTQVYANIMDITVVRDLEKTASSKK	WP_141408434.1	GCF_006546965.1	NZ_CP041230.1	110388	111560	+	390	23;107	2	Bacteroides xylanisolvens strain H207	AGTTCTGCAAAGACTTTGCAGA	AGTTCTGCAAAGACTTTGCAGA
GCF_016864215.1_ASM1686421v1	81.818	Bacteroides	xylanisolvens	MEKISYNLVFNRKKRLNKKGMALVQVEAYLNRKKMYFSTKIYLKPDQWDAKRKMVKNHPNANVLNRMLYENIAAIEHTELGLWQQGKPISLDLLKNSIDKPLSNGSSFLTFFKEEVANSLLKESTRQNHLSTLELLQEFKKEILFTDLTFEFVSSFDNHLQSKGYHLNTIAKHMKHLKRYINVAINKEYMDIQKYAFRKYKIKSIEGSHTHLAPEELYRFENLQLTGRYTRLQKTKDAFLFCCYAGLRYSDFTSLTSANIVEFHQETWIIYKSVKTGIEVRLPLYLLFEGKGIEILQRYKDDLDSFFKLKDNSNINKELNLLAGLAKIDKRVSFHTARHTNATLLLYSGANITTVQKLLGHKSVKTTQVYANIMDITVVRDLEKTASSKNNNRYKS	WP_004315066.1	GCF_016864215.1	NZ_CP045612.1	4303688	4304878	+	396	222;23	2	Bacteroides xylanisolvens strain funn3	AGTTCTGCAAAGACTTTGCAGA	AGTTCTGCAAAGACTTTGCAGA
GCF_018279805.1_ASM1827980v1	81.818	Bacteroides	xylanisolvens	MEKISYNLVFNRKKRLNKKGMALVQVEAYLNRKKMYFSTKIYLKPDQWDAKRKMVKNHPNANVLNRMLYENIAAIEHTELGLWQQGKPISLDLLKNSIDKPLSNGSSFLTFFKEEVANSLLKESTRQNHLSTLELLQEFKKEILFTDLTFEFVSSFDNHLQSKGYHLNTIAKHMKHLKRYINVAINKEYMDIQKYAFRKYKIKSIEGSHTHLAPEELYRFENLQLTGRYTRLQKTKDAFLFCCYAGLRYSDFTSLTSANIVEFHQETWIIYKSVKTGIEVRLPLYLLFEGKGIEILQRYKDDLDSFFKLKDNSNINKELNLLAGLAKIDKRVSFHTARHTNATLLLYSGANITTVQKLLGHKSVKTTQVYANIMDITVVRDLEKTASSKNNNRYKS	WP_004315066.1	GCF_018279805.1	NZ_CP042282.1	6152110	6153300	-	396	222;23	2	Bacteroides xylanisolvens strain APCS1/XY	AGTTCTGCAAAGACTTTGCAGA	AGTTCTGCAAAGACTTTGCAGA
GCF_018289035.1_ASM1828903v1	81.818	Bacteroides	xylanisolvens	MEKISYNLVFNRKKRLNKKGMALVQVEAYLNRKKMYFSTKIYLKPDQWDAKRKMVKNHPNANVLNRMLYENIAAIEHTELGLWQQGKPISLDLLKNSIDKPLSNGSSFLTFFKEEVANSLLKESTRQNHLSTLELLQEFKKEILFTDLTFEFVSSFDNHLQSKGYHLNTIAKHMKHLKRYINVAINKEYMDIQKYAFRKYKIKSIEGSHTHLAPEELYRFENLQLTGRYTRLQKTKDAFLFCCYAGLRYSDFTSLTSANIVEFHQETWIIYKSVKTGIEVRLPLYLLFEGKGIEILQRYKDDLDSFFKLKDNSNINKELNLLAGLAKIDKRVSFHTARHTNATLLLYSGANITTVQKLLGHKSVKTTQVYANIMDITVVRDLEKTASSKNNNRYKS	WP_004315066.1	GCF_018289035.1	NZ_CP072212.1	3337705	3338895	-	396	23;222	2	Bacteroides xylanisolvens strain CL11T00C41	AGTTCTGCAAAGACTTTGCAGA	AGTTCTGCAAAGACTTTGCAGA
GCF_018289135.1_ASM1828913v1	82.519	Bacteroides	xylanisolvens	MEKISYNLVFNRKKRLNKRGMALVQVEAYLNRKKMYFSTKIYLKPEQWDAKRKMVKNHPNANVLNRMLYENIAAIEQTELGLWQQGKSISLDLLKNSIDKPLSNGRSFLTFFKEEIANSSLKESTRQNHLSTLELLQEFKKEVLFTDLTFEFVSSFDNYLQSKGYHLNTIAKHMKHLKRYINVAINKEYMDIQKYAFRKYKIKSIEGSHTHLAPEELHKFENLQLTGRYTRLQKTKDAFLFCCYAGLRYSDFTNLTSANIVEFHQETWIIYKSVKTGMEVRLPLYLLFEGKGIQILQRYKDDLNSFFKLKDNSNINKELNILAGLAKIDKRVSFHTARHTNATLLLYNGANITTVQKLLGHKSVKTTQVYANIMDITVVRDLEKTASSKK	WP_004326266.1	GCF_018289135.1	NZ_CP072216.1	3471028	3472200	+	390	23;222	2	Bacteroides xylanisolvens strain CL11T00C03	AGTTCTGCAAAGACTTTGCAGA	AGTTCTGCAAAGACTTTGCAGA
GCF_024758345.1_ASM2475834v1	82.519	Bacteroides	xylanisolvens	MEKISYNLVFNRKKRLNKRGMALVQVEAYLNRKKMYFSTKIYLKPEQWDTKRKMVKNHPNANVLNRMLYENIAAIEQTELGLWQQGKSISLDLLKNSIDKPLSNGRSFLTFFKEEIANSSLKESTRQNHLSTLELLQEFKKEVLFTDLTFEFVSSFDNYLQSKGYHLNTIAKHMKHLKRYINVAINKEYMDIQKYAFRKYKIKSIEGSHTHLAPEELHKFENLQLTGRYTRLQKTKDAFLFCCYAGLRYSDFTNLTSANIVEFHQETWIIYKSVKTGMEVRLPLYLLFEGKGIQILQRYKDDLNSFFKLKDNSNINKELNILAGLAKIDKRVSFHTARHTNATLLLYNGANITTVQKLLGHKSVKTTQVYANIMDITVVRDLEKTASSKK	WP_008650053.1	GCF_024758345.1	NZ_CP103094.1	115594	116766	+	390	23;107;696	3	Bacteroides xylanisolvens strain BFG-514	AGTTCTGCAAAGACTTTGCAGA	AGTTCTGCAAAGACTTTGCAGA	no motif
GCF_024759125.1_ASM2475912v1	81.818	Bacteroides	xylanisolvens	MEKISYNLVFNRKKRLNKKGMALVQVEAYLNRKKMYFSTKIYLKPDQWDAKRKMVKNHPNANVLNRMLYENIAAIEHTELGLWQQGKPISLDLLKNSIDKPLSNGSSFLTFFKEEVANSLLKESTRQNHLSTLELLQEFKKEILFTDLTFEFVSSFDNHLQSKGYHLNTIAKHMKHLKRYINVAINKEYMDIQKYAFRKYKIKSIEGSHTHLAPEELYRFENLQLTGRYTRLQKTKDAFLFCCYAGLRYSDFTSLTSANIVEFHQETWIIYKSVKTGIEVRLPLYLLFEGKGIEILQRYKDDLDSFFKLKDNSNINKELNLLAGLAKIDKRVSFHTARHTNATLLLYSGANITTVQKLLGHKSVKTTQVYANIMDITVVRDLEKTASSKNNNRYKS	WP_004315066.1	GCF_024759125.1	NZ_CP103098.1	181739	182929	+	396	23;222	2	Bacteroides xylanisolvens strain BFG-319	AGTTCTGCAAAGACTTTGCAGA	AGTTCTGCAAAGACTTTGCAGA
GCF_029369765.1_ASM2936976v1	81.818	Bacteroides	xylanisolvens	MEKISYNLVFNRKKRLNKKGMALVQVEAYLNRKKMYFSTKIYLKPDQWDAKRKMVKNHPNANVLNRMLYENIAAIEHTELGLWQQGKPISLDLLKNSIDKPLSNGSSFLTFFKEEVANSLLKESTRQNHLSTLELLQEFKKEILFTDLTFEFVSSFDNHLQSKGYHLNTIAKHMKHLKRYINVAINKEYMDIQKYAFRKYKIKSIEGSHTHLAPEELYRFENLQLTGRYTRLQKTKDAFLFCCYAGLRYSDFTSLTSANIVEFHQETWIIYKSVKTGIEVRLPLYLLFEGKGIEILQRYKDDLDSFFKLKDNSNINKELNLLAGLAKIDKRVSFHTARHTNATLLLYSGANITTVQKLLGHKSVKTTQVYANIMDITVVRDLEKTASSKNNNRYKS	WP_004315066.1	GCF_029369765.1	NZ_CP120351.1	3911031	3912221	-	396	23;222	2	Bacteroides xylanisolvens strain AY11-1	AGTTCTGCAAAGACTTTGCAGA	AGTTCTGCAAAGACTTTGCAGA
GCF_002998435.1_ASM299843v1	64.675	Bacteroides	zoogleoformans	MNKITYRLVYNRKKCLNRQGTALVQVEAYLKNKKKYFSTGVYLKPEQWDTARCVVKKHPNADALNRWIQQYATEIEKKELDMWRQGKRISLESLKDGLSGNSGPSSFLHFFKQEVENSTLKKSSKSNHLSTLALLGEFKKDLCFADLTFEFITSFECFLRSKGYHINTIAKHMKHLKRQVNIAINKDYMKMREYPFRKYKIKTVANKHTHLTPEELERLEYLPLMGKAAKYRKTLDAFLFCCYTGIRFSDFINLSSDNIVEIYRETWLVYRTVKTDTEVRLPLFLLFDGKALGILDKYKDAPDCFYQLKNNSNVNKELIMLARLANLGKRISFHTARHTNATLLIYKGVNITTVQKLLGHKSLKTTQVYAEVMDMTIVQDLKKNSVKPNGESGRFADDK…	WP_106041627.1	GCF_002998435.1	NZ_CP027231.1	2392687	2393901	+	404	1361;992	2	Bacteroides zoogleoformans strain ATCC 33285	AGTTCCGCGAAAACTTTGCAGA	AGTTCCGCGAAAACTTTGCAGA
GCF_000012825.1_ASM1282v1	58.182	Phocaeicola	vulgatus	MRKISYRFVYNRKKSLNDRGTALVQVEAYLNKKKVYFSTHVYLRPEQWDVKRKIIKDHPNQDALNGMLNEFIIELEKKELSLWRQGKTITLSLIKEEFKSNTDASFLGFARKEIMSSQLKDSTKRNHLTTISLLQSFKPTIEFEDLTYNFVTDFEKNLYESGYQTNTVAKHMKHLKSFVNAAINKGYIDPNNYAFRRYKIKMKEGKHVFLLPEEMKKLEEVSLTGRNSCLEHTLDAFLFCCYTGLRYSDFVNLNEKNIVKMDGKLWLIFDSVKTGTEVKLPLNLLFEGKALTLLQKYQGKWSSFFSIKNNSSVNKELIRIGKLAKISKHFSFHSARHTNATLLIYKGANITTVQKLLGHKNLATTQIYGEVMGSTIIRDLKKCQKR	WP_011965357.1	GCF_000012825.1	NC_009614	2389560	2390720	+	386	na	6	Phocaeicola vulgatus ATCC 8482	AGTTCCGCAAAGACTTTGGTAG	AGTTCCGCAAAGACTTTGGTAG	AGTTCCGCAAAGACTTTGGTGG	AGTTCCGCAAAGACTTTGGTAG	AGTTCCGCAAAGACTTTGGTAG	AGTTCCGCAAAGACTTTGGTAG
GCF_013009555.1_ASM1300955v1	57.922	Phocaeicola	dorei	MRKISYRFVYNRKKSLNDRGTALVQVEAYLNKKKVYFSTHVYLRPEQWDVKRKIIKEHPNQDALNGMLNEFIIELEKKELSLWRQGKTITLSLIKEEFKSNTDASFLGFARKEIMSSQLKDSTKRNHLTTISLLQSFKPTIEFEDLTYNFVTDFEKFLYDSDYQTNTVAKHMKHLKSFVNAAINKGYIDPNNYAFRRYKIKMKEGKHVFLLPEEMKKL EEVSLIGRNSCLEHTLDAFLFCCYTGLRYSDFVSLNEKNIVKMDGKLWLIFDSVKTGAEVKLPLSLLFEGKALTLLQKYQGKWSSFFSIKNNSSVNKELIRIGKLARINKHFSFHS ARHTNATLLIYKGANITTVQKLLGHKNLATTQIYGEVMGSTIVRDLKKCQKR	WP_007836410.1	GCF_013009555.1	NZ_CP046176	748577	749737	+	386	na	4	Phocaeicola dorei DSM 17855	AGTTCTGCAAAGACTTTGGTAG	AGTTCTGCAAAGACTTTGGTAG	AGTTCTGCAAAGACTTTGGTAG	AGTTCTGCAAAGACTTTGGTGG
GCF_000190575.1_ASM19057v1	50.259	Phocaeicola	salanitronis	KKISYRLVYNRKKHLNANGKALIQVEAYLTGQKAYFSTHIYVKPEQWDSKHGRIVLHPHEEALNRMLDEFLLNLQYREL EGWKQGKAVALSLLKTELPEVTEERFFAFGRKWVEHSERKRSTRNNLNTTLALVQEFRPHLNISDIDYAFLLQFESFLKQ RALKTNTIAKHLFHLRTFYNEAVREGLAAPESSPFTKYKIRTTESRHVFLLPEELEKLEKLALALEGKPLCHSLDAFLFC CYTGLRYSDFTKLSEKNLVCPDKKHAWLLFKSQKTGVESQLPLDLLFQGKAVRILEKYEDKNSFFRLKPNPDVNKDLIRI GKLAQIEKHFSFHSSRHTNATLLIYSGAKLTTVQKLLGHRSIKTTQIYGEVFSQTLVNDLKKCKF	WP_013618772.1	GCF_000190575.1	NC_015164.1	3368486	3369643	+	388	na	4	Phocaeicola salanitronis DSM 18170	AGTTCGGCCGGAACTTTGGTGA	AGTTCGGCCGGAACTTTGGTGA	AGTTCGGCCGGAACTTTGGTGA	AGTTCGGCCGGAACTTTGGTGA
GCF_016888945.1_ASM1688894v1	54.922	Phocaeicola	coprophilus	MKKINYRLVYNRKKSLNNEGKALVQVEAYLESKKIYFSTHIYLYPEQWDTRHAIIIKHPQEEELNRMLQEFMLKLQWKELKAWKEGKDISLSLLKDTPSHYK HHPADFFDFGEHWVENSSRKESTKHNLQTTLALLKDFKRSLTFEDFTYSFLQEFETYLRKRQYTINTIAKHMKHLKTFINEAINQDLMDSSNYPFRKYKIKMTESKHTFLRPEEIS SLENLKLPLRWSHLQHTLDAFLFCCYTGLRYSDFTHLSSDNLMKDQKQIWLVFTSVKTGVETRLPLRLLFQGKALLLLNKYRKDLEFFFRLKKNSLVNKELIRIGKLAQITQHFSF HSARHTNASLLIYQGAQITTVQKLLGHRSIKTTQGYSNIFSDTIIKDLKRCCSHEKTTK	WP_013618772.1	GCF_016888945.1	NZ_CP069440.1	3023497	3024678	+	416	na	2	Phocaeicola coprophilus	AGTTCGGCGGAAACTTTGCTTA	AGTTCGGCGGAAACTTTGCTTA
GCF_900128475.1	64.49	Mediterranea	massiliensis	MDKIVYNLVYNRKKSLNGKGTALVQIEAYLNQRKKYFSTKVYLKPEQWDCKRQLVKNHPNSGALNWWLHE SIARIEKVELDLWQQGKPITLEIIRDAMRTKENIRSFLTFYEREVSQANLKESSRRNHLTTLALLKAFKA EVEFSEVTFDFVCAFEQHLRRKGYHINTIAKHMKHLKRYVNMAINKDFMEERKYAFRKYKIKTVENSHTH LTPEELERLEELRQCGCSRQQKRTLDAFLFCCYAGLRYSDFVQMTSQNLIKCRSEVWLVYKSVKTGTEVH LPLHLLFNGKAVAILGEYKGNLDGFFRLKDNSNINKELRILAERAQVNKRVSFHTARHTNATLLIYNGVN ITTVQKLLGHKSVKTTQIYANIMDRTIVHDLEMHQERFGSGVRR…	WP_072544905.1	GCF_900128475.1	NZ_LT635835.1	444476	445681	-	407	na	3	Mediterranea massiliensis Marseille-P2645T	AGTTCCGCGAAGACTTTGGTGA	AGTTCCGCGAAGACTTTGGTAA	AGTTCCGCGAAGACTTTGGTAA
