# Supplementary material
Source: Research Square preprint supplement (doi:10.21203/rs.3.rs-8987032/v1)
Supplement: Supplementary file 2 [file 6da0b8044fe0599bddcae487.xlsx]

## Sheet: E. coli
Supplementary Table S1. Primers used for E. coli experiments in this study.
Primer Name	Forward Primers(5'->3')	Reverse Primers (5'->3')	Purpose/Vector
IRL_Fp1	CCAGTGAATCCGTAATCATGGTCATAGCTGTTTCCTGTGTAAGTTCCAGAAGAACTTGTTATCCGCTCACGTGTAGGCTGGAGCTGCTTC+ cat-midR2 GCCGACATGGAAGCCATCAC		Inverted repeats (AAGTTCCAGAAGAACTT) into E. coli DA24100 chromsome using DIRex half-cassettes ((cite Näsvall 2017 Direct and Inverted Repeat stimulated excision (DIRex))) (AcatsacA binding sequence P1 in bold)
IRL_Rp1		CTTCCGGCTCGTATGTTGTGTGGAATTGTGAGCGGATAACAAGTTCTTCTGGAACTTACACAGGAAACAGGTGTAGGCTGGAGCTGCTTC + cat-midF CGACGATTTCCGGCAGTTTC
IRR_Fp1	TTCTGCATATTAATTGACATTTCTATAGTTAAAACAACGTAAGTTCTTCTGGAACTTGGTGCACCTGGTGGTGTAGGCTGGAGCTGCTTC + cat-midR2 GCCGACATGGAAGCCATCAC
IRR_Rp1		GCTACAATCAAAACATGCCCGAATGTGCACCAGGTGCACCAAGTTCCAGAAGAACTTACGTTGTTTTAACGTGTAGGCTGGAGCTGCTTC + cat-midF CGACGATTTCCGGCAGTTTC
plasmid Backbone pZS*21 with overhangs into BF0667	GACGTGCTTGGGTACTATATTTTCTCCTCTTTAATGAATTCGGTC	GACGTGCTTGGGTACTATATTTTCTCCTCTTTAATGAATTCGGTC	Gibson Assembly primer for plasmid pInvertase with XerC (BF0667 ) referred to as IRY
BF0667 with plasmid overhangs	GAGGAGAAAGGTACCATGAGCACAAATATAGTACCCAAGCACGTC	TCTAGCACGCGTACCATGGGATCCGAACTGTGATTCGTGTTAAC
Verification Plasmid pInvertase (IRY)	CCTGCGTGCAATCCATCTTG	TGTCCCACTGTTCTGGCTTT	Verification primer for pInvertase Y
plasmid Backbone pZS*21 with overhangs into NTEF	CACTTTCATATCGTTAGTCAGCATCAAATAAAACGAAAGGC	GAATAAAGAATTAATATCTCTCTTTCTCCTCTTTAATGAATTCGG	Gibson Assembly primer for plasmid pInvertase with XerC (B. uniformis NTEF) referred to as IRX
XerC-like NTEF with plasmid overhangs	AGAGATATTAATTCTTATTCTAATCCCATC	TGACTAACGATATGAAAGTGTAG
Verification Plasmid pInvertase (IRX)	CCTGTCTCTTGATCAGATCTTG	CAATCTTTCCTAATTCCTCCGG	Verification primer for pInvertase X
primer1_Lac_genotype	AAGATCGCACTCCAGCCA		primer to test Lac operon status: Lac + and Lac- genotype primer
primer2_Lac_genotype		CCAATACGCAAACCGCCT
primer3_Lac_genotype	CCATACCACTTCGCGCAACA
primer4_Lac_genotype		TCGCCATCATCAGCCCAAC

## Sheet: Bacteroides
Supplementary Table S1. Primers used for Bacteroides experiments in this study.
Primer Name	Forward Primers(5'->3')	Reverse Primers (5'->3')	Purpose/Vector
s1R_uniformis		AGCGTGAAGACAGTGAAGCA	Primer for all forward and reverse combinations of the susCD-like transporter genes in Bacteroides thetaiotomicron, Bacteroides uniformis and Phocaeicola vulgatus.
s2R_uniformis		CACACCCCAGGAACCGTTAA
s3R_uniformis		ACCAGATGTCAAGTCGCCAG
s4R_uniformis		ATGGCATCTACACGCGGAAT
s5R_uniformis		CGCGAATTCTGATGCTTGCA
s6R_uniformis		AGCATTGGTTGTCTCGTCGT
vulgatus NTEF	TGGTAACCGCTCAGATCACG
s1R_vulgatus		AGGTCGTTTCGTTGCCTTCT
s2R_vulgatus		GTGAAGACCAACCTGCCGTA
s3R_vulgatus		CCACACGTCCCAAGAAACCT
s4R_vulgatus		ACACCGATTTCTGCCCAAGG
s5R_vulgatus		CCGCAGAACTAACTACGCCA
s6R_vulgatus		GCATCACGACGGAAAGAAGC
theta NTEF	GCCTAGTAACTGCTCAGACTCA
s1R_theta		ACGAACCATCACGACGGAAA
s2R_theta		GCCACCCAATTCTTCCGGTA
s3R_theta		ACCAACCAGTCCCATGTGTG
